22 **Abstract**

23 Evolution of morphogenesis is generally associated with changes in genetic  
24 regulation. Here we report evidence indicating that dorsal closure, a conserved  
25 morphogenetic process in dipterans, evolved as the consequence of rearrangements in  
26 epithelial organization rather than signaling regulation. In *Drosophila melanogaster*,  
27 dorsal closure consists of a two-tissue system where the contraction of  
28 extraembryonic amnioserosa and a JNK/Dpp-dependent epidermal actomyosin cable  
29 result in microtubule-dependent seaming of the epidermis. We find that dorsal closure  
30 in *Megaselia abdita*, a three-tissue system comprising serosa, amnion and epidermis,  
31 differs in morphogenetic rearrangements despite conservation of JNK/Dpp signaling.  
32 In addition to an actomyosin cable, *M. abdita* dorsal closure is driven by the rupture  
33 and contraction of the serosa and the consecutive microtubule-dependent seaming of  
34 amnion and epidermis. Our study indicates that the evolutionary transition to a  
35 reduced system of dorsal closure involves simplification of the seaming process  
36 without changing the signaling pathways of closure progression.

37

38

39 **Impact Statement**

40 Evolutionary reduction in tissue number involves the simplification of the seaming  
41 process but not signaling during epithelial fusion.

42

43

44 **Key words:** *Megaselia abdita*, dorsal closure, microtubule cytoskeleton,  
45 extraembryonic tissue (serosa/amnion), tissue seaming, evolution of development  
46 (evo-devo)

47

## 48 **Introduction**

49 Mechanical forces produced at the cellular level are known to shape tissues during  
50 morphogenesis (see Lecuit et al., 2011, for a recent review). Molecular motors and  
51 cytoskeletal elements generate these mechanical forces, which cause tissues to deform  
52 and change shape (Mammoto and Ingber, 2010). Until recently, such tissue-level  
53 aspects of morphogenesis have received relatively little attention in the field of  
54 evolutionary developmental biology. The evolution of developmental processes is  
55 generally attributed to changes in genetic regulation (see for example, Carroll et al.,  
56 2009; Davidson and Erwin, 2006; Peter and Davidson, 2015; Wilkins, 2002). To date,  
57 it is not fully understood how a developing organism integrates the mechanical and  
58 genetic factors necessary to shape a tissue, or how this interplay between tissue  
59 mechanics and genetics is contributing to the evolution of development. We focus on  
60 this latter aspect by studying how a continuous epidermal layer is formed by epithelial  
61 fusion during dorsal closure in a non-model organism, the scuttle fly *Megaselia*  
62 *abdita* (Diptera: Phoridae).

63

64 Epithelial fusion is a fundamental morphogenetic mechanism in animal development  
65 where two opposing epithelial sheets are brought together to subsequently seam and  
66 result in a single continuous epithelial layer (Jacinto et al., 2001). Dorsal closure in  
67 *Drosophila melanogaster* (Diptera: Drosophilidae) is a classical model system to  
68 study epithelial fusion (Jacinto et al., 2000). This process is promoted by the  
69 mechanical action of different players: a contractile actomyosin cable forming at the  
70 leading edge of the epidermal flanks, the extraembryonic amnioserosa which covers  
71 the dorsal opening and generates contractile forces during epidermal flank

72 advancement, and the eventual seaming of the epidermis through a mechanism  
73 involving microtubule-based cellular protrusions (Eltsov et al., 2015; Hutson et al.,  
74 2003; Kiehart et al., 2000; Saias et al., 2015). Genetically, the c-Jun N-terminal kinase  
75 (JNK) pathway and the transforming growth factor beta (TGF- $\beta$ ) family gene  
76 *decapentaplegic (dpp)* play an essential regulatory role in the process (Fernandez et  
77 al., 2007; Glise and Noselli, 1997; Jacinto et al., 2002; Knust, 1997). The expression  
78 of *dpp* localizes to the leading edge of the epidermal flanks and depends on the  
79 activity of the *D. melanogaster* JNK gene (*basket, bsk*). Embryos lacking *bsk* activity  
80 show downregulation of *dpp* at the epidermal leading edge, failure of dorsal closure  
81 progression, and a dorsal-open phenotype in the larval cuticle (Glise and Noselli,  
82 1997; Sluss et al., 1996). At the molecular level, activation of the JNK/Dpp signaling  
83 pathways promotes the formation and maintenance of the actomyosin cable at the  
84 epidermal leading edge (Ducuing et al., 2015) and, thus, progression of the opposing  
85 epidermal flanks towards the dorsal midline where they meet. At the final stage of  
86 dorsal closure, the opposing epidermal flanks “zipper” or “seam” through the action  
87 of microtubules that align towards the dorsal opening and promote the formation of  
88 filopodial protrusions at both epidermal leading edges (Jacinto et al., 2002; Jankovics  
89 and Brunner, 2006; Millard and Martin, 2008).

90

91 Dorsal closure is a conserved morphogenetic process that occurs in all insects  
92 (Chapman, 1998). Whereas in *D. melanogaster* it involves two tissues, the embryonic  
93 epidermis and the extraembryonic amnioserosa, in most insects it involves three: the  
94 embryonic epidermis, an extraembryonic amnion, and a separate extraembryonic  
95 serosa (Panfilio, 2008; Schmidt-Ott and Kwan, 2016). These complex anatomical  
96 differences raise the question whether the mechanisms responsible for epithelial

97 fusion in a simple two-tissue system are conserved in a three-tissue system. The  
98 phorid scuttle fly *M. abdita* (placed in an early-branching cyclorraphan lineage)  
99 presents a three-tissue system of dorsal closure and has been established as a model to  
100 study the evolution of developmental processes (Bullock et al., 2004; Rafiqi et al.,  
101 2008; Schmidt-Ott et al., 1994; Stauber et al., 2000; Wotton et al., 2015). Thus, *M.*  
102 *abdita* offers the opportunity to compare the three-tissue system of dorsal closure to  
103 the two-tissue system present in *D. melanogaster*.

104

105 Here, we perform a quantitative characterization of dorsal closure in *M. abdita*.  
106 Combining molecular tools with live imaging, we show that dorsal closure in  
107 *M. abdita* embryos occurs in three distinct phases: (i) serosa rupture and retraction,  
108 (ii) serosa contraction and progression of opposing epidermal flanks, and (iii) a dual  
109 seaming process to eventually form a fused continuous epidermis. Despite the  
110 significant morphological differences with *D. melanogaster*, the regulation of dorsal  
111 closure in *M. abdita* involves a conserved role for the JNK/Dpp signaling pathway to  
112 form and maintain an epidermal actomyosin cable surrounding the dorsal opening.  
113 More specifically, we find that following an actomyosin-dependent contraction of the  
114 serosa, two consecutive microtubule-dependent seaming events take place in the  
115 amnion as well as in the epidermis. In both cases, apical microtubule bundles align  
116 and extend towards the site of closure suggesting a general epithelial fusion  
117 mechanism. Altogether, our results provide a dynamic and quantitative description of  
118 epithelial fusion in a complex three-tissue system. They indicate that the evolutionary  
119 transition from a three-tissue to a two-tissue system of dorsal closure involves  
120 changes in the number and sequence of morphogenetic events, rather than changes in

121 the spatio-temporal activity of the main signaling pathways that control closure  
122 progression.

123

## 124 **Results**

### 125 **Dorsal closure in *Megaselia abdita* involves synchronized serosa rupture and** 126 **epidermal progression.**

127 In order to map the spatial arrangement of tissues involved in dorsal closure of  
128 *M. abdita* embryos, we obtained confocal projections of fixed non-devitellinized  
129 embryos with stained nuclei. Nuclear anatomy and staining have been used previously  
130 to identify extraembryonic tissues in the flour beetle *Tribolium castaneum* (Panfilio *et*  
131 *al.*, 2013). In *M. abdita*, staining fixed embryos with the nuclear dye DAPI allowed us  
132 to distinguish three types of tissues: (1) The extraembryonic serosa, which constitutes  
133 the outermost extraembryonic layer and envelops the entire *M. abdita* embryo before  
134 the onset of dorsal closure (magenta in figure 1A, 1A' and 1B, B'). Its cells have very  
135 large nuclei (average size  $125 \pm 21 \mu\text{m}^2$ , SD,  $n=150$  cells) and show discontinuous or  
136 “punctuated” DAPI staining (magenta in figure 1A, 1A' and figure 1— supplement  
137 1A-A' and B-B''). (2) The extraembryonic amnion, which is 1–2 cells wide, localizes  
138 in between the serosal and epidermal tissues (blue in figure 1A, 1A' and 1B, B'). Its  
139 cells also have large nuclei (average size  $77 \pm 16 \mu\text{m}^2$ , SD,  $n=150$  cells) and show a  
140 more continuous, “compact” DAPI staining (blue in figure 1A, 1A' and figure 1—  
141 supplement 1A-A' and B-B''). (3) The embryonic epidermis, which contains  
142 numerous small nuclei (average size  $14 \pm 3 \mu\text{m}^2$ , SD,  $n=150$  cells) that are tightly  
143 packed (gray in figure 1A and A').

144

145 In order to obtain a closer view of the spatial arrangement of tissues in live *M. abdita*  
146 embryos, we injected DAPI at the embryo poles during dorsal closure stage and  
147 obtained confocal projections. This staining showed that amnion cells sit on top of  
148 yolk granules, and are positioned adjacent to the embryonic epidermis (blue  
149 arrowheads in figure 1— supplement 1C-C’’).

150

151 When fixing *M. abdita* embryos at dorsal closure stage, devitellinization also removes  
152 the serosa together with the vitelline membrane (figure 1— supplement 2A).  
153 Devitellinization and serosa cells removal resulted in a gap on the dorsal side of the  
154 embryo, seen as lack of phalloidin staining (figure 1— supplement 2B). Amnion cells  
155 (1–2 cell rows adjacent to the epidermis, blue arrowheads in figure 1— supplement  
156 2B) remained apposed to an intact epidermis. In a few cases, devitellinization left  
157 some intact serosa cells on top of *M. abdita* embryos (very large cells highlighted by  
158 phalloidin and DAPI counterstains, white arrowhead in figure 1— supplement 2C and  
159 C’). An optical re-slice of confocal projections of the intact serosa and amnion cells  
160 showed that these two cells types are apposed (yellow arrowhead in figure 1—  
161 supplement 2C’’).

162

163 In summary, the anatomy of *M. abdita* embryos at dorsal closure reveals a three-tissue  
164 system, where large serosa cells surround the embryo and are apposed to the amnion  
165 cells at the dorsal-most end of the embryo. Amnion cells form a row, in turn apposed  
166 to the adjacent epidermis (figure 1B and B’). This three-tissue geometry poses an  
167 interesting challenge for the process of dorsal closure, since the apposed serosa and  
168 amnion need to undergo dramatic rearrangements to achieve epidermal fusion at the  
169 end of dorsal closure.

170

171 How does *M. abdita* solve this problem? At early stages of dorsal closure, the serosa  
172 surrounding the embryo undergoes an abrupt rupture (Wotton et al., 2014). Serosa  
173 rupture initiates close to the posterior pole of the embryo. Spread of the rupture occurs  
174 anteriorly through the ventral side of the embryo and results in a retraction of the  
175 serosa towards the dorsal end of the embryo (figure 1C). During this process, serosa  
176 cells accumulate at the dorsal opening (magenta arrowheads in figure 1D, and  
177 magenta cells in 1G-G''). In the meantime, the amnion remains in place, apposed to  
178 the serosa (blue arrowheads in figure 1D, and blue cells in 1G-G''), and adjacent to  
179 the embryonic epidermis (white arrowheads in figure 1D, and green line in 1G-G'').

180

181 To gain quantitative evidence on the dynamics of dorsal closure in *M. abdita*, we  
182 labeled live embryos with the fluorescent lipophylic dye FM 4-64 and followed the  
183 process using confocal imaging (video 1). We used the fusion of the dorsal ridge  
184 (merging of the ridge primordia at the dorsal midline, magenta bar in figure 1—  
185 supplement 3A and A') as a developmental landmark for the initiation of dorsal  
186 closure ( $T=0$  min) (Campos-Ortega and Hartenstein, 1997; VanHook and Letsou,  
187 2008). Under this time frame, the serosa ruptures at  $T=25$  min ( $\pm 8$  min, SD;  $n=15$   
188 embryos) and dorsal closure (seaming of the embryonic epidermal flanks at the dorsal  
189 midline, see yellow line in figure 1— supplement 3A'') concludes at  $T=74$  min ( $\pm 10$   
190 min, SD,  $n=15$  embryos).

191

192 To relate serosa retraction to the kinetics of dorsal closure, we measured the relative  
193 changes in area of the serosa covering the embryo and the relative changes in height  
194 ( $h$ ) of the dorsal opening over time (see red and blue curves in figure 1F, yellow



195 dashed line in figure 1E, blue line in figure 1— supplement 3A- and Materials and  
196 Methods). At *early* stages of dorsal closure, the leading edge of the epidermis  
197 straightens (yellow line in figure 1— supplement 3A, 3A'') and the dorsal opening  
198 increases progressively in height ( $h$ ) (blue curve in figure 1F). After dorsal ridge  
199 fusion (pink area in figure 1F), the serosa ruptures, retracts and accumulates onto the  
200 dorsal opening (figure 1C, magenta arrowheads in 1D, yellow dashed line in 1E,  
201 magenta cells in 1G'-G''). This is concurrent with a fast reduction in dorsal opening  
202 height (red and blue curves in figure 1F, yellow line in figure 1— supplement 3A'-  
203 A''). Visualizing the process from an orthogonal view, we observe that following  
204 serosa accumulation on top of the dorsal opening, this extraembryonic tissue bends  
205 inwards and serosa cells undergo an apicobasal elongation resulting in the  
206 internalization of a large part of the serosa cells into the yolk prior to epidermal fusion  
207 (video 2 and figure 1— supplement 3B and 3C-C'). At *late* dorsal closure stages, the  
208 serosa is fully internalized (magenta cells in figure 1G'') and the two epidermal flanks  
209 continue progressing towards the dorsal midline, covering the dorsal opening and  
210 eventually fusing completely (figure 1— supplement 3A'').

211

212 **Inhibition of JNK/Dpp signaling in *Megaselia abdita* arrests dorsal closure but**  
213 **not serosa rupture.**

214 Since the JNK and Dpp signaling pathways are known to regulate dorsal closure in  
215 *D. melanogaster* embryos, and their impairment results in the failure of dorsal closure  
216 and in a dorsal-open phenotype (Glise and Noselli, 1997; Sluss et al., 1996), we  
217 wondered whether JNK and Dpp signaling would also be important regulators of  
218 dorsal closure and serosa retraction in *M. abdita* embryos. Using *in situ* hybridization  
219 and cuticle preparations, we observed that in wild-type embryos, *M. abdita dpp*

220 (*Mab\_dpp*) is expressed along the leading edge of the epidermis (black arrowheads in  
221 figure 2A) and progression of dorsal closure results in the deposition of a continuous  
222 larval cuticle (figure 2A'), very similar to *D. melanogaster*. Next, we perturbed the  
223 *M. abdita* JNK pathway, using gene knockdown by RNA interference (RNAi, see  
224 Materials and Methods) against *M. abdita bsk* (*Mab\_bsk*) in pre-gastrulating embryos.  
225 Around 90% of *Mab\_bsk* dsRNA-injected embryos developed to at least germband  
226 retraction stage (821 out of 922 embryos). *Mab\_bsk* RNAi knock-down resulted in  
227 both a disrupted pattern of *Mab\_dpp* expression (including a complete absence of  
228 expression at the leading edge of the epidermis, magenta arrowheads in figure 2B)  
229 and a dorsal-open phenotype in the larval cuticle (magenta arrowheads in figure 2B')  
230 of ~64% of RNAi-injected and developed embryos (528 out of 821 embryos). Both  
231 phenotypes are similar to the ones that occur in *D. melanogaster* embryos after  
232 JNK/Dpp signaling perturbation. Interestingly, live imaging of RNAi-injected  
233 embryos reveals that serosa rupture and retraction still occur (yellow dashed line in  
234 figure 2C–C'' and video 3), despite a failure of progression of the epidermal flanks  
235 (yellow arrowheads in figure 2— supplement 1B; note that the embryo from video 3  
236 and figure 2C corresponds to the same embryo in figure 2— supplement 1B, 24 hours  
237 after RNAi injection). In summary, these results indicate that JNK and Dpp signaling  
238 regulate progression of dorsal closure in *M. abdita* as in *D. melanogaster* embryos,  
239 but are not required for the regulation of serosa rupture and retraction.

240

241 **Actomyosin contractility in the serosa and an actomyosin epidermal cable are**  
242 **necessary for dorsal closure in *Megaselia abdita* embryos.**

243 In *D. melanogaster* embryos, both a JNK/Dpp-dependent contractile epidermal cable  
244 and the contraction of the amnioserosa tissue (through actomyosin contractility and

245 volume decrease) power the progression of dorsal closure (Hutson et al., 2003;  
246 Kiehart et al., 2000; Saias et al., 2015). The actomyosin cytoskeleton is therefore an  
247 essential component in force generation during this process. To gain insights into the  
248 structures generating forces during dorsal closure in *M. abdita*, we stained fixed  
249 embryos with phalloidin (to reveal F-actin) or a phosphoMyosin antibody. Both stains  
250 showed accumulation at the leading edge of the epidermis (green arrowheads in figure  
251 3A and 3B) and at the surface of serosa cells during internalization (red arrowheads in  
252 figure 3A and 3B). Measurements from time-lapse sequences showed that serosa cell  
253 area reduces over time during their accumulation at the dorsal opening, from an  
254 average of  $212 \pm 52 \mu\text{m}^2$  (SD;  $n=20$  cells) to  $76 \pm 18 \mu\text{m}^2$  (SD;  $n=20$  cells) to  $33 \pm$   
255  $\mu\text{m}^2$  (SD;  $n=20$  cells) at 20, 30 and 40 min after serosa rupture, respectively (figure  
256 3— supplement 1B). This cell area reduction correlates with an apical accumulation  
257 of actin at early stages of serosa internalization (white arrowheads in figure 3—  
258 supplement 1c-c’), suggesting an apical constriction mechanism through actomyosin  
259 contraction during serosa internalization. In contrast, amnion cells show low levels of  
260 actin and myosin, even during late stages of dorsal closure after full serosa  
261 internalization (blue arrowhead in figure 3A and 3B, figures 3 C’’ and figure 3—  
262 supplement 1A). Closer observation also reveals the presence of actin-enriched  
263 filopodia-like extensions protruding from the actomyosin cable (yellow arrowheads in  
264 figure 3— supplement 1D and D’). RNAi knock-down of *Mab\_bsk* strongly reduces  
265 the level of actin accumulation at the epidermal leading edge compared to wild-type  
266 embryos (white arrows in figure 3— supplement 2A and B). This suggests that the  
267 embryonic epidermal cable is similar in structure and regulated by the JNK/Dpp  
268 signaling pathway in both *M. abdita* and *D. melanogaster* embryos.

269

270 A timed sequence of phalloidin-stained *M. abdita* embryos (figure 3C–C''') reveals  
271 further details concerning the dynamics of dorsal closure: upon serosa internalization,  
272 the amniotic flanks (devoid of actomyosin) move to the dorsal midline where the two  
273 flanks merge (white arrowhead in figure 3C''). Upon merging of amnion flanks, the  
274 actomyosin cable propels the epidermal flanks to the dorsal midline where epidermal  
275 seaming takes place (yellow arrowheads in figure 3C', C'' and C''').

276

277 To affect actomyosin-based tissue contractility, we injected *M. abdita* embryos with  
278 the Rho kinase (ROCK) inhibitor Y-27632. This drug has been extensively used in  
279 *D. melanogaster* to inhibit actomyosin contractility by blocking ROCK activity and,  
280 consequently, downstream targets including myosin phosphorylation (Czerniak et al.,  
281 2016; Monier et al., 2010; Sommi et al., 2011). Injection of Y-27632 at early stages of  
282 *M. abdita* dorsal closure reduces actomyosin accumulation at the epidermal leading  
283 edge compared to wild-type embryos (white arrowheads in figure 3— supplement 2A  
284 and C). The progression of the epidermal leading edge is arrested upon treatment  
285 (figure 3— supplement 2D–D'' and video 4). The internalization of serosa cells is also  
286 abolished as observed by the lack of inward bending and apicobasal elongation of this  
287 tissue in orthogonal view (figure 3— supplement 2E–E'' and video 5). These  
288 observations indicate that actomyosin contractility contributes to both the  
289 internalization of the serosa and progression of the epidermal leading edge.  
290 Interestingly, the kinetics of serosa retraction in Y-27632-injected embryos seemed  
291 less affected during the first half of the process than the second half (purple curve in  
292 figure 3D), suggesting that actomyosin-based cell contraction is taking place mainly  
293 at the final stage of retraction and during serosa internalization.

294

295 Taken together, these results indicate that actomyosin-based contractility within the  
296 serosa and the cable surrounding the dorsal opening are required for the progression  
297 of dorsal closure in *M. abdita* embryos.

298

299 **A microtubule-based seaming of the extraembryonic amnion is required for**  
300 **dorsal closure in *Megaselia abdita* embryos.**

301 In addition to an actomyosin cable, the microtubule cytoskeleton is known to be  
302 essential during the last step of dorsal closure in *D. melanogaster*. In epidermal cells  
303 at the leading edge, microtubules align in apical bundles parallel to the dorsoventral  
304 axis and protrude into stable filopodia. These aligned epidermal microtubules are  
305 required for proper epidermal seaming and their depolymerization leads to defects in  
306 seaming and incomplete closure in *D. melanogaster* (Jankovics and Brunner, 2006).

307 We investigated whether such a microtubule configuration is observable during dorsal  
308 closure in *M. abdita* as well. Staining fixed *M. abdita* embryos at different stages of  
309 late dorsal closure with a  $\beta$ -tubulin antibody, we observed that microtubules in the  
310 epidermis also orient towards the dorsal midline (figure 4— supplement 1A and B)  
311 and protrude from the epidermal leading edge (white arrowheads in figure 4—  
312 supplement 1B) forming apical bundles (figure 4— supplement 1B’). This epidermal  
313 microtubule alignment is maintained throughout epidermal flank advancement and  
314 during epidermal seaming (figure 4— supplement 1C-C’’). Interestingly, we find a  
315 similar alignment of microtubules in the extraembryonic amnion, where microtubule  
316 bundles localize apically (figure 4B’) and orient towards the internalizing serosa (blue  
317 arrowheads in figure 4A and B and figure 4— supplement 1A). This apical  
318 microtubule alignment in the amnion seems to follow cell elongation. To support this  
319 observation, we estimated apical cell surface area by performing a Voronoi

320 tessellation around the nuclei of extraembryonic cells. We could observe that amniotic  
321 cells present an elongated apical cell surface area ( $285 \pm 81 \mu\text{m}^2$ , SD;  $n=12$  cells; blue  
322 arrowheads in figure 4— supplement 1D) compared to serosa cells ( $57 \pm 23 \mu\text{m}^2$ , SD;  
323  $n=108$  cells; red arrowheads in figure 4— supplement 1D). Both apical microtubule  
324 alignment and elongated apical cell surface area in the amnion are maintained during  
325 serosa internalization and merging of amnion cells from opposite flanks (blue  
326 arrowheads in figure 4B and figure 4— supplement 1C-C'). Amnion microtubule  
327 alignment is subsequently lost after the opposite amnion flanks meet at the dorsal  
328 midline (blue arrowhead in figure 4— supplement 1C'').

329

330 Since microtubule alignment is necessary for epidermal seaming during dorsal closure  
331 in *D. melanogaster*, we reasoned that a similar microtubule alignment in the amnion  
332 of *M. abdita* embryos could indicate epithelial amniotic fusion through seaming in  
333 this species. To follow the last steps of *M. abdita* dorsal closure more closely, we  
334 imaged FM 4-64-labeled embryos during the *late* stage of dorsal closure (video 6).  
335 We observed that upon serosa internalization, the opposing amniotic flanks of  
336 *M. abdita* embryos meet and fuse at the dorsal midline, suggesting an amniotic  
337 seaming process (blue-shaded area in figure 4C, C' and C''). Immediately after  
338 amniotic seaming occurred, the epidermal flanks progressed dorsally and also seamed  
339 on top of the continuous amnion (green dashed line in figure 4C, C' and C''). An  
340 estimation of seaming velocities in the amnion and epidermis ( $8.1 \pm 2 \mu\text{m}/\text{min}$  and  $3.8$   
341  $\pm 1.7 \mu\text{m}/\text{min}$ , SD,  $n= 5$  embryos, respectively) shows a variation in speed between  
342 the two processes that could result from a difference in the mechanical properties of  
343 the fusing epithelia or the seaming angle at each canthi.

344

345 To investigate the functional role of microtubules in amnion cell elongation and  
346 seaming, we injected embryos with the microtubule depolymerizing drug colcemid  
347 (Jankovics and Brunner, 2006). Injection of colcemid does not perturb the kinetics of  
348 serosa retraction (figure 4— supplement 2A), actin accumulation in serosa cells (red  
349 arrowheads in figure 4— supplement 2B and B’), straightening of the epidermal  
350 leading edge (white arrowheads in figure 4D), or actin cable formation (white  
351 arrowheads in figure 4— supplement 2B and B’). An orthogonal view from a time-  
352 lapse sequence also shows that the initial inward bending and apicobasal elongation of  
353 the serosa cells during internalization occurs in both wild type and colcemid injected  
354 embryos (video 7 and magenta dashed lines in figure 1— supplement 3C-C’ and  
355 figure 4— supplement 2C-C’).

356

357 In contrast, dorsal closure arrests during the internalization of the serosa (red  
358 arrowhead in figure 4D’’) and does not progress towards epithelial seaming (video 8  
359 and red curve in figure 4E). We observe that microtubule polymerization does not  
360 occur in colcemid-injected embryos (blue and white arrowheads for amnion and  
361 epidermal cells, respectively, in figure 4— supplement 2D compared to 2D’) and that  
362 amnion cells initially elongate towards the dorsal midline as in wild type conditions,  
363 although they relax and retract from the amnion merging site (figure 4— supplement  
364 4A and video 9). In order to test the role of the microtubule assembly, specifically in  
365 the amnion, we deactivated the depolymerizing effect of colcemid treatment on dorsal  
366 closure progression with UV light. UV-irradiation was performed in a region between  
367 the epidermis and the internalizing serosa, corresponding to the amnion (magenta area  
368 in figure 4— supplement 3A’’). In UV-irradiated embryos, dorsal closure progressed  
369 further, reducing the height ( $h$ ) of the dorsal opening, compared to colcemid treated

370 embryos, although it did not progress to the extent of wild type control embryos  
371 (figure 4— supplement 3B). Taken together, these observations indicate that the  
372 microtubule cytoskeleton in the amniotic tissue is required for seaming of the amnion  
373 and the completion of dorsal closure.

374

375 In summary, the results presented in this section indicate the presence of subsequent  
376 microtubule-based seaming processes in both the amnion and the epidermis during  
377 dorsal closure in *M. abdita*. First, opposing amniotic flanks fuse at the dorsal midline  
378 upon serosa ingression, followed by epidermal seaming (see schematics in figure 4F  
379 and F' and lower panels of figure 4— supplement 4b–b''). Both of these processes are  
380 necessary for the completion of epidermal seaming and dorsal closure, to result in a  
381 continuous embryonic epidermal sheet.

382

383

#### 384 **Discussion**

385 In this study, we provide a detailed characterization of epithelial fusion during dorsal  
386 closure in the non-drosophilid scuttle fly *M. abdita*. In this species, dorsal closure  
387 involves three different tissues: the embryonic epidermis, as well as the  
388 extraembryonic amnion and serosa. Dorsal closure in *M. abdita* occurs in three  
389 distinct phases: (i) rupture and retraction of the extraembryonic serosa surrounding  
390 the embryo, (ii) concurrent contraction of both an epidermal actomyosin cable and the  
391 serosal tissue in the dorsal region of the embryo leading to internalization of the  
392 serosa into the dorsal opening, and (iii) successive seaming processes fusing first the  
393 amnion and then the epidermis. Even though genetic regulation of dorsal closure by  
394 the JNK and Dpp signaling pathways appears to be conserved between *M. abdita* and



395 *D. melanogaster*, the sequence of morphogenetic rearrangements is very different  
396 between the two species. These differences, however, result in the same output: a  
397 continuous epidermal layer covering the dorsal region of the embryo.

398

399 In *M. abdita*, the serosa encloses the whole embryo. It is apposed to the amnion,  
400 which in turn is apposed to the epidermis at the edge of the dorsal opening  
401 (schematics in figure 1B and B') (see also Rafiqi et al., 2008). The rupture of the  
402 serosa is the first step of a series of complex morphogenetic events. Although the  
403 initiation signal for serosal rupture is not yet known, we can discard a purely  
404 mechanical trigger since injection of the embryo prior to dorsal closure did not induce  
405 serosal rupture and global retraction, despite resulting in a small wound and a slight  
406 retraction of the tissue around the injection site. In addition, rupture still occurs in  
407 embryos injected with Rho-kinase (ROCK) inhibitor, which reduces actomyosin  
408 contractility. Lastly, rupture always initiates at a very specific ventral-posterior site.  
409 Taken together, these observations indicate that rupture is not triggered exclusively by  
410 global straining and non-autonomous forces applied to the serosa tissue. Instead,  
411 rupture seems to be triggered by a specific localized cue.

412

413 Upon rupture, the remaining serosal tissue retracts and constricts dorsally through an  
414 actomyosin-dependent mechanism, in a way similar to serosa rupture and retraction in  
415 the beetle *T. castaneum* (Hilbrant et al., 2016; Panfilio et al., 2013). The retracting  
416 serosa then internalizes into the dorsal opening of *M. abdita*. Concomitant with  
417 serosal internalization, a JNK/Dpp-dependent actomyosin cable forms at the  
418 epidermal leading edge of *M. abdita* embryos. It promotes the advancement of the  
419 opposing epidermal flanks towards the dorsal midline, and the eventual seaming of

420 the two flanks. This stage of dorsal closure occurs in a similar fashion to  
421 *D. melanogaster*, but differs in comparison with *T. castaneum*, where no actomyosin  
422 epidermal cable appears to be involved in epidermal flank advancement (Panfilio et  
423 al., 2013).

424

425 In contrast to *D. melanogaster*, dorsal closure in *M. abdita* involves an additional  
426 amniotic seaming process. Our experimental data indicate that amniotic seaming is  
427 microtubule-dependent and essential for dorsal closure to occur. Thus, similar to  
428 epidermal seaming in *D. melanogaster* embryos, where microtubules align  
429 dorsoventrally prior to tissue fusion (Jankovics and Brunner, 2006), the two  
430 sequential amniotic and epidermal seaming processes in *M. abdita* also involve a  
431 dorsoventral alignment of microtubules.

432

433 Why microtubules align in this way remains unclear. One possible scenario is that  
434 shape elongation of amniotic cells towards the retracting and internalizing serosa  
435 could promote microtubule reorientation in the direction of contractile cells.  
436 Interestingly, cellular fusion in the developing trachea of *D. melanogaster* involves  
437 cell elongation and microtubules orientation towards the site of fusion (Kato et al.,  
438 2016). Elongation of cells towards a contractile tissue also occurs during gastrulation  
439 in *D. melanogaster* (Rauzi et al., 2015) and neural tube closure in the chordate *Ciona*  
440 *intestinalis* (Hashimoto et al., 2015). It is not known whether microtubule alignment  
441 also occurs in the latter processes to promote epithelial fusion. If this is the case, the  
442 microtubule-dependent seaming that we describe might reflect a common mechanism  
443 for epithelial tissues to fuse.

444

445 It remains unclear whether microtubule-dependent epithelial seaming is a process that  
446 can generate forces contributing to dorsal closure. In the case of *D. melanogaster*,  
447 laser-ablation of epidermal canthi (*i.e.* the epidermal corners where opposing  
448 epidermal flanks meet) slows down the last stages of dorsal closure (Wells et al.,  
449 2014). However, F-actin-enriched epidermal seaming still occurs between the  
450 opposing leading edges of the epidermis despite the removal of the canthi.

451

452 Dorsal closure in embryos of *M. abdita* presents two sequential seaming events that  
453 share a common feature: transient microtubule reorganization. It would be interesting  
454 to explore if the cytoskeletal basis (*i.e.* microtubule reorganization) of epithelial  
455 seaming events is conserved in other insect species with a three-tissue system of  
456 dorsal closure, for example *T. castaneum*.

457

458 Our work suggests that the evolutionary transition from a three-tissue to a two-tissue  
459 system of dorsal closure not only involves the reduction of extraembryonic tissue, *e.g.*  
460 from distinct amnion and serosa to a fused amnioserosa (see Horn et al., 2015; Rafiqi  
461 et al., 2008; Rafiqi et al., 2010; Schmidt-Ott and Kwan, 2016). In addition, it requires  
462 changes in epidermal progression and seaming events. Further development of  
463 imaging and molecular tools in *M. abdita* will help us better understand the  
464 subcellular, cellular, and tissue dynamics that led to this evolutionary transition.

465

466 In the case of dipteran dorsal closure, it appears that the evolutionary modulation of  
467 tissue remodeling is mainly driven by morphological rearrangements rather than large  
468 changes in gene expression. This study provides the first detailed analysis of tissue  
469 anatomy and dynamics complemented with gene expression assays to understand the

470 evolution of a morphogenetic process. In this respect, dipterans provide a powerful  
471 model to understand the interplay between tissue rearrangement and gene expression  
472 during the evolution of development.

473

474

## 475 **Material and Methods**

### 476 **Fly Husbandry, Embryo Collection, Cloning Procedures, and RNAi knock-** 477 **down.**

478 Our *M. abdita* fly culture was maintained as previously described (Rafiqi et al.,  
479 2011a). Embryos were collected at 25°C for 4 hrs, and then incubated at 19°C until  
480 they reached stages 13–15, corresponding to dorsal closure as described in Wotton et  
481 al. (2014). *Mab\_bsk* was cloned using sequence data from a published early  
482 embryonic transcriptome (<http://diptex.crg.es>; gene ID: *Mab\_bsk*: MK10) (Jimenez-  
483 Guri et al., 2013). Briefly, open reading frames (ORFs) were PCR-amplified based on  
484 cDNA from 0–5hr-old *M. abdita* embryos. Amplified fragments were cloned into  
485 PCRII-TOPO (Invitrogen) or pGEM-T (Promega) vectors using the following specific  
486 primers (5'/3'): *Mab\_bsk*, TGCCCGTCATCAGTTTTACA and  
487 GACGACGCGGGACTACTTTA. dsRNA was performed using the Ambion  
488 MEGAscript kit (Life Technologies). The following specific primers (5'/3')  
489 containing a T7 promoter sequence at their 5' end were used: *Mab\_bsk*,  
490 GGTGGGCGACACAAGATT and AACAGGCATCGGGGAAT. RNAi injection  
491 was performed using previously published protocols (Rafiqi et al., 2008; Rafiqi et al.,  
492 2010, 2011d; Wotton et al., 2015). Dechorionated embryos were injected prior to  
493 gastrulation at a concentration of 5 µM for *Mab\_bsk*, then incubated at 25°C. The

494 injected dsRNA construct comprised 798 nucleotides (base pairs 369–1166 of the  
495 ORF) for *Mab\_bsk*.

496

#### 497 ***In Situ* Hybridization, Immunohistochemistry, and Cuticle Preparations.**

498 *In situ* hybridization in heat-fixed *M. abdita* embryos was performed according to a  
499 previously published protocol from *D. melanogaster* (Crombach et al., 2012).

500 Digoxigenin-labeled *Mab\_dpp* probe is from Jiménez-Guri et al. (2013). Fixation,  
501 devitellinization and immunostaining of *M. abdita* embryos were performed as

502 previously described (Rafiqi et al., 2011c; Rafiqi et al., 2012) with slight

503 modifications. Briefly, embryos undergoing dorsal closure were dechorionated and

504 fixed for 25 min in heptane and PEMS (100 mM PIPES, 2 mM EGTA and 1 mM

505 MgSO<sub>4</sub>, pH 6.9), in a 3:1 PEMS:methanol solution, and a final concentration of 6.5%

506 formaldehyde. Embryos were postfixed and hand devitellinized as described (Rafiqi

507 et al., 2012). Microtubules were stained using a monoclonal primary antibody

508 (mouse) against  $\beta$ -tubulin (E7, Developmental Studies Hybridoma Bank) at a dilution

509 1:100, and a secondary antibody conjugated to Alexa 488 dye (Invitrogen) at a

510 dilution of 1:1000. For phalloidin staining, embryos were fixed for 1 hr using PEMS

511 and a final concentration of 8% formaldehyde, hand-devitellinized as described for

512 *D. melanogaster* embryos (Fernandez et al., 2007; Kaltschmidt et al., 2002; Rothwell

513 and Sullivan, 2000), and incubated with phalloidin-Alexa488 or phalloidin-Alexa563

514 (Invitrogen) at a dilution of 1:200 for 1 hr. When double-staining against phalloidin

515 and microtubules, embryos were fixed, hand-devitellinized, and stained for phalloidin

516 first, followed by incubation with the  $\beta$ -tubulin primary and secondary antibodies as

517 above. Nuclei were counterstained using DAPI (1:1000). Embryos were washed in

518 PBT (PBS, with 0.1% Triton X-100), and mounted using ProLong Gold Antifade

519 (Invitrogen). Cuticle preparations of *M. abdita* embryos were performed as previously  
520 described (Rafiqi et al., 2011b) with slight modifications. Briefly, embryos were fixed  
521 and hand-devitellinized before preparing and mounting the cuticles. Images of cuticle  
522 preparations were taken using a phase-contrast microscope.

523

524 **Microscopy, Live Imaging, Pharmacology, UV irradiation, and Image**  
525 **Processing.**

526 Time-lapse imaging was performed with dechorionated *M. abdita* embryos. RNAi-  
527 injected embryos were imaged using a Zeiss Cell Observer with a controlled  
528 temperature chamber at 25°C and phase contrast settings. For fluorescence imaging,  
529 wild type embryos at dorsal closure stage were desiccated for 5 min, aligned, oriented,  
530 and immobilized on a coverslip with heptane glue, covered with halocarbon oil and  
531 injected at the embryo poles with 1 mM (needle concentration) of the lipophilic dye  
532 FM 4-64 (Molecular Probes). Embryos were imaged at room temperature using an  
533 Andor Revolution XD spinning-disk confocal microscope. ROCK inhibitor Y-27632  
534 (Sigma) and colcemid (Santa Cruz Biotech) were prepared to 10 mM and 500 µg/ml  
535 (needle concentration), and also injected at the embryo poles during dorsal closure  
536 stage. Control embryos were injected with water or DMSO, respectively. Final needle  
537 concentrations of dye and/or drugs were prepared in injection buffer (10 mM HEPES,  
538 180 mM NaCl, 5 mM KCl and 1 mM MgCl<sub>2</sub>, pH 7.2), and delivered to the interstitial  
539 space formed between the serosa and the embryo. Confocal projections of ~10 z-stack  
540 images (1 µm spacing) were used to generate time-lapse sequences in dorsal view.  
541 Orthogonal views from time-lapse live imaging were obtained by reslicing confocal z-  
542 stacks of 0.25 µm spacing. The height (*h*) of the dorsal opening is the maximum  
543 perpendicular distance from the dorsal midline to the epidermal leading edge (Hutson

544 et al., 2003). The changes in area of the serosa covering the embryo over time were  
545 determined by approximating the embryonic shape using an ellipse and resizing  
546 manually to follow the serosa edge on one lateral side during retraction, assuming that  
547 serosa retraction occurs symmetrically on both sides of the embryo after rupture along  
548 the ventral midline. Detection of serosal edge morphology from bright-field time-  
549 lapse sequences was performed by subtracting images at time  $t+1$  from images at time  
550  $t$ . This operation rendered the contour of the retracting serosa visible. The  
551 identification of extraembryonic tissues was performed using nuclear anatomy,  
552 staining profiles and  $z$  position of the nuclei in confocal stack images obtained from  
553 fixed embryos labeled with DAPI. Staining profiles, nuclear areas and  $z$  position in  
554 the embryo were measured in 150 cells for each cell type (serosa and amnion) from  
555 15 different embryos. UV irradiation experiments to deactivate colcemid were  
556 performed as follows: dechorionated, desiccated, FM 4-64 labeled and colcemid -  
557 injected *M. abdita* embryos were immobilized in heptane glue, mounted in halocarbon  
558 oil, and imaged dorsally in an inverted Leica TCS SP5 laser-scanning confocal  
559 microscope in resonant scanner mode. A region of interest (ROI) was selected  
560 comprising an area between the epidermal flanks and the internalizing serosa,  
561 corresponding to the extraembryonic amnion. The ROI was scanned for at least 30  
562 seconds using a 405-nm UV laser and imaging was resumed after irradiation. Fixed,  
563 immunostained embryos were imaged as follows: images were acquired using an  
564 inverted Leica TCS SP5 laser-scanning confocal microscope. All post-acquisition  
565 image processing and analysis was done using ImageJ software (NIH). For Voronoi  
566 analysis, the center of mass of cell nuclei was detected manually with Fiji and used as  
567 seed for Voronoi tessellation with Matlab.

568

569 **Acknowledgments**

570 We would like to thank Eva Jiménez-Guri, Karl Wotton, and Arturo D'Angelo for  
571 reagents and invaluable technical advice during the development of the project. We  
572 thank Steffen Lemke for providing training and technical advice as well as Jordi  
573 Casanova and Petra Stockinger for discussions and critical reading of the manuscript.  
574 All confocal imaging was done at the CRG Advanced Light Microscopy Unit. J.J.F-Z  
575 was supported by a CRG International Interdisciplinary Postdoctoral Programme  
576 (INTERPOD) fellowship, co-funded by Marie Curie Actions. We acknowledge  
577 support from the Spanish Ministry of Economy and Competitiveness (MINECO),  
578 'Centro de Excelencia Severo Ochoa 2013-2017', SEV-2012-0208 and Plan Nacional  
579 BFU2015-68754-P.

580

581 **Author contributions**

582 J.J.F-Z. performed the experiments. J.J.F-Z. and J.S. performed the analysis. J.J.F-Z.,  
583 J.S. and J.J. designed the research and wrote the manuscript.

584

585 **Competing interests**

586 The authors declare no competing financial or non-financial interests.

587

588 **References**

589 Bullock, S.L., Stauber, M., Prell, A., Hughes, J.R., Ish-Horowicz, D., Schmidt-Ott,  
590 U., 2004. Differential cytoplasmic mRNA localisation adjusts pair-rule transcription  
591 factor activity to cytoarchitecture in dipteran evolution. *Development* (Cambridge,  
592 England) 131, 4251-4261.  
593  
594 Campos-Ortega, J.A., Hartenstein, V., 1997. *The embryonic development of*  
595 *Drosophila melanogaster*. 2nd ed.  
596  
597 Carroll, S.B., Grenier, J.K., Weatherbee, S.D., 2009. *From DNA to Diversity:*  
598 *Molecular Genetics and the Evolution of Animal Design*. Wiley.



599

600 Chapman, R.F., 1998. The insects: structure and function, 4th ed. Cambridge  
601 University Press, Cambridge, UK ; New York, NY.

602

603 Crombach, A., Cicin-Sain, D., Wotton, K.R., Jaeger, J., 2012. Medium-throughput  
604 processing of whole mount in situ hybridisation experiments into gene expression  
605 domains. PLoS One 7, e46658.

606

607 Czerniak, N.D., Dierkes, K., D'Angelo, A., Colombelli, J., Solon, J., 2016. Patterned  
608 Contractile Forces Promote Epidermal Spreading and Regulate Segment Positioning  
609 during *Drosophila* Head Involution. *Curr Biol* 26, 1895-1901.

610

611 Davidson, E.H., Erwin, D.H., 2006. Gene regulatory networks and the evolution of  
612 animal body plans. *Science* 311, 796-800.

613

614 Ducuing, A., Keeley, C., Mollereau, B., Vincent, S., 2015. A DPP-mediated feed-  
615 forward loop canalizes morphogenesis during *Drosophila* dorsal closure. *J Cell Biol*  
616 208, 239-248.

617

618 Eltsov, M., Dube, N., Yu, Z., Pasakarnis, L., Haselmann-Weiss, U., Brunner, D.,  
619 Frangakis, A.S., 2015. Quantitative analysis of cytoskeletal reorganization during  
620 epithelial tissue sealing by large-volume electron tomography. *Nat Cell Biol* 17, 605-  
621 614.

622

623 Fernandez, B.G., Arias, A.M., Jacinto, A., 2007. Dpp signalling orchestrates dorsal  
624 closure by regulating cell shape changes both in the amnioserosa and in the epidermis.  
625 *Mechanisms of development* 124, 884-897.

626

627 Glise, B., Noselli, S., 1997. Coupling of Jun amino-terminal kinase and  
628 Decapentaplegic signaling pathways in *Drosophila* morphogenesis. *Genes Dev* 11,  
629 1738-1747.

630

631 Hashimoto, H., Robin, F.B., Sherrard, K.M., Munro, E.M., 2015. Sequential  
632 contraction and exchange of apical junctions drives zippering and neural tube closure  
633 in a simple chordate. *Dev Cell* 32, 241-255.

634

635 Hilbrant, M., Horn, T., Koelzer, S., Panfilio, K.A., 2016. The beetle amnion and  
636 serosa functionally interact as apposed epithelia. *Elife* 5.

637

638 Horn, T., Hilbrant, M., Panfilio, K.A., 2015. Evolution of epithelial morphogenesis:  
639 phenotypic integration across multiple levels of biological organization. *Front Genet*  
640 6, 303.

641

642 Hutson, M.S., Tokutake, Y., Chang, M.S., Bloor, J.W., Venakides, S., Kiehart, D.P.,  
643 Edwards, G.S., 2003. Forces for morphogenesis investigated with laser microsurgery  
644 and quantitative modeling. *Science* 300, 145-149.

645

646 Jacinto, A., Martinez-Arias, A., Martin, P., 2001. Mechanisms of epithelial fusion and  
647 repair. *Nat Cell Biol* 3, E117-123.

648

- 649 Jacinto, A., Wood, W., Balayo, T., Turmaine, M., Martinez-Arias, A., Martin, P.,  
650 2000. Dynamic actin-based epithelial adhesion and cell matching during *Drosophila*  
651 dorsal closure. *Curr Biol* 10, 1420-1426.  
652
- 653 Jacinto, A., Woolner, S., Martin, P., 2002. Dynamic analysis of dorsal closure in  
654 *Drosophila*: from genetics to cell biology. *Dev Cell* 3, 9-19.  
655
- 656 Jankovics, F., Brunner, D., 2006. Transiently reorganized microtubules are essential  
657 for zippering during dorsal closure in *Drosophila melanogaster*. *Dev Cell* 11, 375-385.  
658
- 659 Jimenez-Guri, E., Huerta-Cepas, J., Cozzuto, L., Wotton, K.R., Kang, H.,  
660 Himmelbauer, H., Roma, G., Gabaldon, T., Jaeger, J., 2013. Comparative  
661 transcriptomics of early dipteran development. *BMC Genomics* 14, 123.  
662
- 663 Kaltschmidt, J.A., Lawrence, N., Morel, V., Balayo, T., Fernandez, B.G., Pelissier,  
664 A., Jacinto, A., Martinez Arias, A., 2002. Planar polarity and actin dynamics in the  
665 epidermis of *Drosophila*. *Nat Cell Biol* 4, 937-944.  
666
- 667 Kato, K., Dong, B., Wada, H., Tanaka-Matakatsu, M., Yagi, Y., Hayashi, S., 2016.  
668 Microtubule-dependent balanced cell contraction and luminal-matrix modification  
669 accelerate epithelial tube fusion. *Nat Commun* 7, 11141.  
670
- 671 Kiehart, D.P., Galbraith, C.G., Edwards, K.A., Rickoll, W.L., Montague, R.A., 2000.  
672 Multiple forces contribute to cell sheet morphogenesis for dorsal closure in  
673 *Drosophila*. *J Cell Biol* 149, 471-490.  
674
- 675 Knust, E., 1997. *Drosophila* morphogenesis: movements behind the edge. *Curr Biol* 7,  
676 R558-561.  
677
- 678 Lecuit, T., Lenne, P.F., Munro, E., 2011. Force generation, transmission, and  
679 integration during cell and tissue morphogenesis. *Annu Rev Cell Dev Biol* 27, 157-  
680 184.  
681
- 682 Mammoto, T., Ingber, D.E., 2010. Mechanical control of tissue and organ  
683 development. *Development (Cambridge, England)* 137, 1407-1420.  
684
- 685 Millard, T.H., Martin, P., 2008. Dynamic analysis of filopodial interactions during the  
686 zippering phase of *Drosophila* dorsal closure. *Development (Cambridge, England)*  
687 135, 621-626.  
688
- 689 Monier, B., Pelissier-Monier, A., Brand, A.H., Sanson, B., 2010. An actomyosin-  
690 based barrier inhibits cell mixing at compartmental boundaries in *Drosophila*  
691 embryos. *Nat Cell Biol* 12, 60-65; sup pp 61-69.  
692
- 693 Panfilio, K.A., 2008. Extraembryonic development in insects and the acrobatics of  
694 blastokinesis. *Dev Biol* 313, 471-491.  
695
- 696 Panfilio, K.A., Oberhofer, G., Roth, S., 2013. High plasticity in epithelial  
697 morphogenesis during insect dorsal closure. *Biol Open* 2, 1108-1118.  
698

- 699 Peter, I., Davidson, E.H., 2015. Genomic Control Process: Development and  
700 Evolution. Elsevier Science.  
701
- 702 Rafiqi, A.M., Lemke, S., Ferguson, S., Stauber, M., Schmidt-Ott, U., 2008.  
703 Evolutionary origin of the amnioserosa in cyclorrhaphan flies correlates with spatial  
704 and temporal expression changes of zen. Proc Natl Acad Sci U S A 105, 234-239.  
705
- 706 Rafiqi, A.M., Lemke, S., Schmidt-Ott, U., 2010. Postgastrular zen expression is  
707 required to develop distinct amniotic and serosal epithelia in the scuttle fly *Megaselia*.  
708 Dev Biol 341, 282-290.  
709
- 710 Rafiqi, A.M., Lemke, S., Schmidt-Ott, U., 2011a. *Megaselia abdita*: culturing and egg  
711 collection. Cold Spring Harb Protoc 2011, pdb prot5600.  
712
- 713 Rafiqi, A.M., Lemke, S., Schmidt-Ott, U., 2011b. *Megaselia abdita*: cuticle  
714 preparation from injected embryos. Cold Spring Harb Protoc 2011, pdb prot5603.  
715
- 716 Rafiqi, A.M., Lemke, S., Schmidt-Ott, U., 2011c. *Megaselia abdita*: fixing and  
717 devitellinizing embryos. Cold Spring Harb Protoc 2011, pdb prot5602.  
718
- 719 Rafiqi, A.M., Lemke, S., Schmidt-Ott, U., 2011d. *Megaselia abdita*: preparing  
720 embryos for injection. Cold Spring Harb Protoc 2011, pdb prot5601.  
721
- 722 Rafiqi, A.M., Park, C.H., Kwan, C.W., Lemke, S., Schmidt-Ott, U., 2012. BMP-  
723 dependent serosa and amnion specification in the scuttle fly *Megaselia abdita*.  
724 Development (Cambridge, England) 139, 3373-3382.  
725
- 726 Rauzi, M., Krzic, U., Saunders, T.E., Krajnc, M., Zihlerl, P., Hufnagel, L., Leptin, M.,  
727 2015. Embryo-scale tissue mechanics during *Drosophila* gastrulation movements. Nat  
728 Commun 6, 8677.  
729
- 730 Rothwell, W.F., Sullivan, W., 2000. Fluorescent analysis of *Drosophila* embryos.  
731 *Drosophila* protocols, 141-157.  
732
- 733 Saias, L., Swoger, J., D'Angelo, A., Hayes, P., Colombelli, J., Sharpe, J., Salbreux,  
734 G., Solon, J., 2015. Decrease in Cell Volume Generates Contractile Forces Driving  
735 Dorsal Closure. Dev Cell 33, 611-621.  
736
- 737 Schmidt-Ott, U., Kwan, C.W., 2016. Morphogenetic functions of extraembryonic  
738 membranes in insects. Current Opinion in Insect Science 13, 86-92.  
739
- 740 Schmidt-Ott, U., Sander, K., Technau, G.M., 1994. Expression of engrailed in  
741 embryos of a beetle and five dipteran species with special reference to the terminal  
742 regions. Roux's archives of developmental biology 203, 298-303.  
743
- 744 Sluss, H.K., Han, Z., Barrett, T., Goberdhan, D.C., Wilson, C., Davis, R.J., Ip, Y.T.,  
745 1996. A JNK signal transduction pathway that mediates morphogenesis and an  
746 immune response in *Drosophila*. Genes Dev 10, 2745-2758.  
747

748 Sommi, P., Cheerambathur, D., Brust-Mascher, I., Mogilner, A., 2011. Actomyosin-  
749 dependent cortical dynamics contributes to the prophase force-balance in the early  
750 *Drosophila* embryo. PLoS One 6, e18366.

751

752 Stauber, M., Taubert, H., Schmidt-Ott, U., 2000. Function of bicoid and hunchback  
753 homologs in the basal cyclorrhaphan fly *Megaselia* (Phoridae). Proc Natl Acad Sci U  
754 S A 97, 10844-10849.

755

756 VanHook, A., Letsou, A., 2008. Head involution in *Drosophila*: genetic and  
757 morphogenetic connections to dorsal closure. Dev Dyn 237, 28-38.

758

759 Wells, A.R., Zou, R.S., Tulu, U.S., Sokolow, A.C., Crawford, J.M., Edwards, G.S.,  
760 Kiehart, D.P., 2014. Complete canthi removal reveals that forces from the  
761 amnioserosa alone are sufficient to drive dorsal closure in *Drosophila*. Mol Biol Cell  
762 25, 3552-3568.

763

764 Wilkins, A.S., 2002. The Evolution of Developmental Pathways. Sinauer Associates.

765

766 Wotton, K.R., Jimenez-Guri, E., Crombach, A., Janssens, H., Alcaine-Colet, A.,  
767 Lemke, S., Schmidt-Ott, U., Jaeger, J., 2015. Quantitative system drift compensates  
768 for altered maternal inputs to the gap gene network of the scuttle fly *Megaselia abdita*.  
769 Elife 4.

770

771 Wotton, K.R., Jimenez-Guri, E., Garcia Matheu, B., Jaeger, J., 2014. A staging  
772 scheme for the development of the scuttle fly *Megaselia abdita*. PLoS One 9, e84421.

773

774

775

776

777

778

779

## 780 **Figure Legends**

781

782 **Figure 1. The extraembryonic serosa ruptures and accumulates dorsally**  
783 **previous to epidermal seaming in *Megaselia abdita*.** (A) Nuclear staining of  
784 *M. abdita* embryos prior to dorsal closure reveals three types of tissues: the  
785 extraembryonic serosa (magenta), the extraembryonic amnion (blue), and the  
786 embryonic epidermis (gray). (A') An orthogonal re-sliced stack along the dashed  
787 yellow line in A shows the position of the embryonic (gray), amniotic (blue), and  
788 serosal (magenta) tissues in transverse view. (B) Schematics depicting the  
789 organization of the serosa cells (magenta), amnion cells (blue), and embryonic  
790 epidermis (green) in lateral and (B') transverse view. The black dashed line represents  
791 the vitelline envelope (C) *M. abdita* embryo undergoing rupture and retraction of  
792 serosal tissue along the ventral side. Staining against  $\beta$ -tubulin in green, and DAPI  
793 nuclear counterstain in magenta. (D) Serosal cells (magenta arrowheads) accumulate  
794 on the dorsal side of the embryo after rupture. The serosa remains apposed to the  
795 amnion (blue arrowheads), which is in turn apposed to the embryonic epidermis  
796 (white arrowheads). Phalloidin stain in green and DAPI nuclear counterstain in  
797 magenta. (E) Images from a time-lapse sequence of serosa retraction in a *M. abdita*

798 embryo injected with the fluorescent lipophilic dye FM 4-64 (from video 1). Yellow  
799 dashed line shows the contour of the serosa covering the embryo during retraction. **(F)**  
800 Relative changes in area of the serosa during retraction (red,  $n=15$  embryos), and  
801 relative changes in height ( $h$ ) of the dorsal opening (blue,  $n=15$  embryos) during  
802 dorsal closure in *M. abdita*. Vertical bars represent standard deviation (SD). Time  
803 range of dorsal ridge fusion is represented by pink area ( $n=15$  embryos) as a landmark  
804 for the initiation of dorsal closure. The origin of the time axis ( $T=0$  min) is set at the  
805 point of serosa rupture. **(G)** Schematics depict transverse views of embryos during  
806 serosa rupture, retraction, and dorsal accumulation. Serosal cells rupture along the  
807 ventral end of the embryo (red arrowhead). **(G')** The remaining lateral serosa cells  
808 retract towards the dorsal side (black arrows). **(G'')** Serosa cells continue retracting  
809 until they completely accumulate onto the dorsal opening (black arrows). Color  
810 scheme as in B. In all embryos and schematics, dorsal is to the top. Embryos in A, C,  
811 D and E show lateral views where anterior is to the left.

812

813 **Figure 1— supplement 1. Identification of extraembryonic tissues in *Megaselia***  
814 ***abdita*.** **(A)** Confocal projection of nuclear staining in an intact *M. abdita* embryo  
815 stained with DAPI. **(A')** Confocal projection and image processing of nuclear staining  
816 from A to separate the extraembryonic serosa (magenta) and extraembryonic amnion  
817 (blue) from the embryonic epidermis. **(B)** Confocal projection to observe the  
818 discontinuous DAPI staining in serosa cells (magenta dashed line) and continuous  
819 DAPI staining in amnion cells (blue dashed line). **(B')** Plotted intensity profiles of the  
820 serosa and amnion showing the discontinuous and continuous DAPI stainings,  
821 respectively. **(B'')** Nuclear size (measured as area in  $\mu\text{m}^2$ ) of serosa cells (average  
822 size  $125 \pm 21 \mu\text{m}^2$ , SD,  $n=150$  cells), amnion cells (average size  $77 \pm 16 \mu\text{m}^2$ , SD,  
823  $n=150$  cells) and epidermal cells (average size  $14 \pm 3 \mu\text{m}^2$ , SD,  $n=150$  cells). **(C-C'')**  
824 Dorsal view of three sequential z-stack confocal images (0, -4 and -6  $\mu\text{m}$ ) in a live *M.*  
825 *abdita* embryo injected with DAPI and showing the localization of amnion cells on  
826 yolk granules and adjacent to the epidermis (blue arrowheads). In all embryos,  
827 anterior is to the left.

828

829 **Figure 1— supplement 2. Description of the three-tissue system anatomy in**  
830 ***Megaselia abdita* prior to dorsal closure.** **(A)** Nuclear staining (DAPI) of serosa  
831 cells (magenta) attached to the vitelline membrane after devitellinization. **(B)**  
832 Phalloidin staining (green) of a devitellinized embryo (dorsal view) showing a gap on  
833 the dorsal side of the embryo left by serosa removal with intact embryonic epidermis  
834 and adjacent amnion cells (blue arrowheads). **(C)** Lateral view of a devitellinized  
835 embryo where a couple of serosa cells (white arrowhead) and amnion cells (blue  
836 arrowhead) remained intact after removal of the vitelline membrane. This embryo  
837 corresponds to an early stage of dorsal closure prior to serosa rupture ( $T \approx 0$  min) as  
838 indicated by large intact serosa cells, the fused dorsal ridge at the anterior end of the  
839 dorsal opening, a straightened epidermal leading edge and the large height ( $h$ ) of the  
840 dorsal opening. **(C')** Higher magnification of the embryo in D at the site where  
841 extraembryonic serosa (white arrowhead) and amnion (blue arrowhead) remained  
842 intact upon devitellinization. **(C'')** Orthogonal stack re-slicing along the white dashed  
843 line in D showing a cross-section of the three-tissue anatomy of *M. abdita* dorsal  
844 closure where amnion cells (blue arrowheads) and serosa cells (white arrowheads) are  
845 apposed (yellow arrowhead). In embryos from A to C' anterior is to the left. In  
846 embryos from C to C'', dorsal is to the top.

847

848 **Figure 1— supplement 3. Anatomical landmarks during dorsal closure**  
849 **progression and serosa internalization. (A-A'')** Dorsal views from a time-lapse  
850 sequence of dorsal closure in a *M. abdita* embryo labeled with the fluorescent dye FM  
851 4-64. Magenta bands depict the position and fusion of the dorsal ridge during the  
852 early and mid phase of dorsal closure. Yellow solid lines show the scalloped  
853 perimeter of the dorsal opening during early phase (A), the straightened perimeter  
854 during mid phase (A'), and the seamed epidermis during late phase (A'') of dorsal  
855 closure. Yellow dotted line shows the dorsal midline and the blue solid line depicts  
856 the measured height (*h*) of the dorsal opening during dorsal closure. **(a-a'')** Raw  
857 images from A-A'' without superimposed labels. In all embryos, anterior is to the left.  
858 **(B-B'')** Dorsal (top) and orthogonal (bottom) views from a time-lapse sequence of a  
859 FM 4-64-labeled *M. abdita* embryo during dorsal closure during mid (B) and late (B'-  
860 B'') phase of dorsal closure (from video 2). The magenta arrow in bottom panel  
861 indicates the extraembryonic serosa cells undergoing apicobasal elongation towards  
862 the yolk and undergoing internalization. Anterior is to the top in dorsal view and  
863 dorsal is to the top in orthogonal view. **(C-C')** Time-lapse images (from top panel of  
864 video 7) showing the apicobasal elongation of the serosa during its retraction and  
865 internalization. In (C), the yellow area indicates the yolk and the magenta dashed lines  
866 highlight serosal apico-basal junctions. (C') represents the same sequence without  
867 labels.

868  
869 **Figure 2. JNK (*bsk*) is required for *dpp* expression and the completion of dorsal**  
870 **closure without affecting serosa rupture or retraction in *Megaselia abdita*. (A)**  
871 Wild-type expression of *Mab\_dpp* (purple stain, black arrowheads) along the dorsal  
872 leading edge of the epidermis in a *M. abdita* embryo (lateral view) during dorsal  
873 closure. **(A')** Cuticle preparation of a wild-type late-stage pre-hatching *M. abdita*  
874 embryo (dorsal view). **(B)** RNAi knock-down of *Mab\_bsk* abolishes *Mab\_dpp*  
875 expression at the leading edge of the epidermis (magenta arrowheads) in a *M. abdita*  
876 embryo (lateral view). **(B')** Cuticle preparation of a *Mab\_bsk* RNAi late-stage pre-  
877 hatching embryo, showing a dorsal-open phenotype (magenta arrowheads). **(C)**  
878 Images from a bright-field time-lapse sequence of serosa retraction in a *M. abdita*  
879 embryo treated with *Mab\_bsk* RNAi (from video 3). Yellow dashed lines show the  
880 perimeter of the serosa covering the embryo during retraction. In all embryos and  
881 cuticles anterior is to the left and dorsal to the top.

882  
883 **Figure 2— supplement 1. *Mab\_bsk* RNAi results in a lack of dorsal closure**  
884 **progression after serosa rupture. (A-A'')** Detection of the serosa edge in the bright-  
885 field time-lapse sequence of *Mab\_bsk* knock-down embryo from figure 2C was  
886 obtained by image subtraction **(a-a'')** to render the retracting serosa visible (magenta  
887 arrowheads). **(B)** *Mab\_bsk* knock-down results in a sclerotized cuticle at the leading  
888 edge of the epidermis (yellow arrowheads) in late-stage pre-hatching embryos. This  
889 phenotype is due to the lack of dorsal closure progression. Note this embryo is the  
890 same as the embryo in the time-lapse sequence in figure 2C, C' and C'' and video 3,  
891 24 hours after dsRNA injection.

892  
893 **Figure 3. An actomyosin-enriched epidermal cable is necessary for the**  
894 **completion of dorsal closure upon contraction, retraction, and internalization of**  
895 **the serosa in *Megaselia abdita*. (A)** F-actin enrichment (as observed by inverted  
896 intensity of phalloidin staining) and **(B)** PhosphoMyosin enrichment (inverted  
897 intensity of immunostaining) in the epidermal leading edge (green arrowhead) and

898 internalizing serosa (red arrowhead), but not in the amnion (blue arrowhead) of a  
899 *M. abdita* embryo during dorsal closure. (C-C'') Time series of different phalloidin-  
900 stained *M. abdita* embryos that show merging of both amniotic and epidermal flanks  
901 brought together at the dorsal midline upon serosa internalization. Amniotic merging  
902 (blue arrowheads) is visible by a transient accumulation of F-actin (white arrowhead  
903 in C''). Epidermal merging is mediated by the actomyosin cable (yellow arrowheads).  
904 (D) Average area of the serosa during retraction in wild-type control (red,  $n=15$   
905 embryos), and contractility-impaired embryos injected with Y-27632 (purple,  $n=15$   
906 embryos). The latter show delayed and incomplete serosal retraction and ingression.  
907 Vertical bars represent standard deviations (SD). Embryos from A to D are in dorsal  
908 view where anterior is to the left. Embryo in D' is an optical transverse view where  
909 dorsal is to the top.

910

911 **Figure 3— supplement 1. Actin accumulates apically in contracting serosa cells**  
912 **and filopodial protrusions are present in the epidermal actin cable of *Megaselia***  
913 ***abdita*.** (A) Lateral view of a *M. abdita* embryo showing F-actin accumulation at the  
914 epidermal leading edge and the internalizing serosa (red arrowheads), but not in the  
915 extraembryonic amnion (blue arrowheads). (B) Serosa cell surface area reduces over  
916 time during contraction from an average of  $212 \pm 52 \mu\text{m}^2$  (SD;  $n= 20$  cells) to  $76 \pm 18$   
917  $\mu\text{m}^2$  (SD;  $n= 20$  cells) to  $33 \pm \mu\text{m}^2$  (SD;  $n= 20$  cells) at 20, 30 and 40 min after serosa  
918 rupture, respectively. (C-C'') Dorsal view of phalloidin-stained *M. abdita* embryos  
919 at different stages of serosa internalization with their corresponding orthogonal stack  
920 re-slicing (c-c''). F-actin accumulates preferentially at the apical part of contracting  
921 serosa cells (white arrowhead) during internalization. White dashed line in C-C''  
922 depicts the site of optical re-slicing. In A and C, phalloidin staining in green and  
923 DAPI counterstain in magenta. In A anterior is to the left and dorsal to the top. In C  
924 anterior is to the top and in c dorsal is to the top. (D) and (D') Filopodia-like  
925 structures (yellow arrowheads) extend from the epidermal cable towards the dorsal  
926 midline as evidenced in dorsal view of a *M. abdita* embryo. Phalloidin staining in  
927 green. In D and D' anterior is to the left.

928

929 **Figure 3— supplement 2. The epidermal actomyosin cable is a contractile**  
930 **structure controlled by JNK (*Mab\_bsk*) expression during dorsal closure.**

931 (A) An actomyosin cable (white arrowhead) at the epidermal leading edge of a wild-  
932 type *M. abdita* embryo. (B) *Mab\_bsk* RNAi results in the absence of an actomyosin  
933 cable (white arrowhead) in *M. abdita* embryos during dorsal closure. (C)  
934 Downregulation of the actomyosin cable (white arrowhead) after injection of the Rho  
935 kinase (ROCK) inhibitor Y-27632. From A to C, embryos are labeled with phalloidin  
936 staining in green and DAPI nuclear counterstain in magenta. Anterior is to the left and  
937 dorsal to the top. (D-D'') Kinetics of serosal retraction in embryo injected with the  
938 Rho-kinase inhibitor Y-27632. Drug treatment arrests the progression of the  
939 epidermal leading edge (magenta arrowheads) and abolishes the dorsal internalization  
940 of the serosa cells (E-E'') Dorsal and transversal views of the retraction of the serosa  
941 in Y-27632 treated embryos. The inward bending and apicobasal cell elongation of  
942 the serosa are prevented and disruption of the tissue occurs without apparent  
943 contraction. Embryos in D and E are taken from time-lapse sequences of FM 4-64-  
944 labeled embryos from videos 4 and 5, respectively. In D, anterior is to the left and  
945 dorsal to the top. In E, the top panel is a dorsal view with anterior to the top and the  
946 bottom panel is a transversal view with dorsal to the top.

947

948 **Figure 4. Microtubule-dependent seaming of the extraembryonic amnion is**  
949 **required for subsequent epidermal seaming during dorsal closure in *Megaselia***  
950 ***abdita*.** (A) Confocal projections of microtubules in the extraembryonic amnion  
951 orienting towards the internalizing serosa during early amniotic seaming. (B) As  
952 amniotic seaming progresses, microtubules maintain alignment, and become localized  
953 apically, as revealed by a transverse view (B'), obtained by orthogonal stack re-slicing  
954 along the blue line in B. Staining against  $\beta$ -tubulin is shown in green, DAPI nuclear  
955 counterstain in magenta. (C) Time-lapse sequence of amniotic seaming (blue dashed  
956 line and blue shaded area) followed by epidermal seaming (green dashed line) along  
957 the dorsal midline in a *M. abdita* embryo injected with the fluorescent lipophilic dye  
958 FM 4-64 (from video 6). (D) Time-lapse sequence of dorsal closure in a colcemid  
959 treated embryo to induce microtubule depolymerization. After serosa retraction the  
960 process is arrested and closure fails. The embryo is labeled by FM 4-64 (from video  
961 8). White arrowheads in D show the proper straightening of the epidermal leading  
962 edge in colcemid-injected embryos. Red arrowhead in D'' indicates impaired serosa  
963 internalization. (E) Relative changes in height ( $h$ ) of dorsal opening during in wild-  
964 type control (blue,  $n=15$  embryos) and embryos injected with colcemid (red,  $n=15$   
965 embryos) to depolymerize microtubules. Vertical bars show standard deviations (SD).  
966 These measurements reveal failed epidermal leading edge progression in colcemid-  
967 treated *M. abdita* embryos. (F) Schematics depicting the transverse view (top) and  
968 dorsal view (bottom) of embryos during serosa cell ingression, initiation of amnion  
969 cell elongation, and microtubule alignment (purple) towards the dorsal midline. Black  
970 arrows indicate the direction of amnion progression. (F') Amnion cells show  
971 alignment of apical microtubule bundles towards the dorsal midline, where the two  
972 amniotic flanks meet, and amniotic seaming occurs (dark blue line). This is followed  
973 by the progression of the epidermal leading edge (dark green arrows), which results in  
974 epidermal seaming and completion of dorsal closure (not shown). Serosa in magenta,  
975 amnion in blue and embryonic epidermis in green. All embryo images show dorsal  
976 views where anterior is to the left.

977

978 **Figure 4— supplement 1. Microtubule alignment is present in both the epidermis**  
979 **and the amnion and correlates with enlarged amniotic cells in *Megaselia abdita*.**

980 (A) Microtubule bundles orient towards the dorsal midline (white dashed line) in both  
981 the epidermis (white arrowhead) and the amnion (blue arrowhead) of *M. abdita*  
982 embryos during dorsal closure. Note that microtubules in the internalizing serosa lack  
983 a clear orientation (red arrowhead). (B) At the epidermal leading edge of *M. abdita*  
984 embryos, microtubule bundles orient dorsoventrally (white arrowheads) and show  
985 apical localization as revealed by a transverse view (B') obtained by orthogonal stack  
986 re-slicing along the yellow line in B. (C-C'') A timed series of fixed embryos shows  
987 that microtubule alignment (blue arrowheads) and amnion cell elongation are  
988 maintained during serosa internalization (C) and the merging of amnion cells from  
989 opposite flanks (C'). Amnion microtubule alignment is lost after the opposite amnion  
990 flanks meet at the dorsal midline (C''). In A-C,  $\beta$ -tubulin staining in green and DAPI  
991 nuclear counterstain in magenta. (D) Estimated apical cell surface area by Voronoi  
992 tessellation around the nuclei of extraembryonic cells stained with DAPI. Amnion  
993 cells (blue arrowheads) present an elongated apical cell surface area compared to  
994 serosa cells (red arrowheads). In all embryos, anterior is to the left.

995

996 **Figure 4— supplement 2. Colcemid treatment prevents microtubule**  
997 **polymerization without affecting serosa retraction or epidermal actomyosin**



998 **cable in *Megaselia abdita*.** (A) Average area of serosa during retraction in wild-type  
999 control embryos (blue,  $n=10$  embryos) and colcemid-injected (red,  $n=10$  embryos).  
1000 Kinetics of serosa retraction did not show an apparent difference in treated embryos  
1001 compared to wild-type control. Vertical bars represent standard deviations (SD). (B)  
1002 Epidermal actomyosin cable (white arrowheads) and contracting serosa (magenta  
1003 arrowheads) in colcemid-injected embryos do show similar F-actin enrichment than  
1004 wild type during the initial stages of internalization. The embryo is in dorsal view.  
1005 Anterior is to the left. (B') Higher magnification of B showing F-actin accumulation  
1006 in the epidermal cable (white arrowheads) and the contracting serosa (magenta  
1007 arrowhead).  $\beta$ -tubulin staining in green, phalloidin counterstain in magenta and DAPI  
1008 counterstain in blue. (C-C') Orthogonal views from a time-lapse sequence of  
1009 colcemid-injected *M. abdita* embryos labeled with FM 4-64 (from bottom panel of  
1010 video 7). Colcemid-treated embryos undergo serosa internalization and apicobasal cell  
1011 elongation towards the yolk similarly than wild type. The yellow area in C highlights  
1012 the yolk region and the dashed magenta lines highlight serosa cell apicobasal  
1013 junctions. C' shows the sequence in C without annotations. Dorsal is to the top. (D)  
1014 Colcemid injection during dorsal closure induces microtubules depolymerization in  
1015 *M. abdita* embryos as observed in both the leading edge of the epidermis (white  
1016 arrowhead) and the extraembryonic amnion (blue arrowhead) compared to a wild-type  
1017 non injected embryo (D').  $\beta$ -tubulin staining in green. Anterior is to the left.

1018

1019 **Figure 4— supplement 3. UV-deactivation of colcemid in the amnion region**  
1020 **allows dorsal closure progression in treated *Megaselia abdita* embryos.** (A) (Left  
1021 panel) Dorsal view of a *M. abdita* wild-type control embryo injected with FM 4-64  
1022 during serosa accumulation at the dorsal opening. Yellow dashed line represents the  
1023 edge of the epidermal flanks. (Right panel) Dorsal closure is completed 60 minutes  
1024 after the initiation of serosa internalization. (A') (Left panel) Dorsal view of a  
1025 colcemid injected embryos labeled with FM 4-64 during serosa accumulation at the  
1026 dorsal opening. (Right panel) 60 minutes after, dorsal closure does not progress and  
1027 the epidermal flanks remain open. (A'') (Left panel) Dorsal view of a colcemid  
1028 injected embryos labeled with FM 4-64 in which UV light is irradiated in a region  
1029 between the epidermal flanks and the internalizing serosa (magenta shaded area,  
1030 corresponding to the amnion) of colcemid-injected embryos. (Right panel) Dorsal  
1031 closure progressed further in UV-irradiated embryos, although the epidermis did not  
1032 close completely after 60 minutes of serosa internalization. Yellow dashed lines  
1033 indicate the epidermal leading edge (B) Relative changes in height ( $h$ ) of dorsal  
1034 opening in wild-type control embryos (white bar;  $4 \pm 1\%$ ,  $n= 10$  embryos), colcemid-  
1035 injected embryos (blue bar;  $90 \pm 21\%$ ,  $n= 10$  embryos) and colcemid-treated/UV-  
1036 irradiated embryos (magenta bar;  $19 \pm 7\%$ ,  $n= 10$  embryos). Error bars are standard  
1037 deviations (SD). These measurements indicate a rescue of dorsal closure progression  
1038 after UV-deactivation of colcemid in *M. abdita* injected embryos.

1039

1040 **Figure 4— supplement 4. Landmarks of amniotic seaming during dorsal closure**  
1041 **progression in *Megaselia abdita*.** (A-A'') Lateral view from two time-lapse  
1042 sequences of dorsal closure progression in *M. abdita* embryos labeled with FM 4-64  
1043 (from video 9). Top panels show a wild-type embryo undergoing serosa accumulation  
1044 (A), amnion cell elongation (A') and epidermal edge progression towards the dorsal  
1045 midline (A''). Bottom panels show a *M. abdita* embryo treated with colcemid  
1046 undergoing serosa accumulation, amnion cell elongation and further retraction of the  
1047 epidermal leading edge from the dorsal midline. In all embryos, dorsal is at the top.

1048 **(B-B'')** Dorsal view from a time-lapse sequence of amniotic seaming (blue dashed  
1049 line and blue shaded area) followed by epidermal seaming (green dashed line) along  
1050 the dorsal midline in a *M. abdita* embryo injected with FM 4-64 (from video 6). **(b-**  
1051 **b'')** Raw images from B-B'' without superimposed labels. In all embryos, anterior is  
1052 to the left.

1053

1054 **Video 1. Dorsal closure in *Megaselia abdita* involves the rupture and retraction of**  
1055 **the serosa and advancement of the epidermal flanks to the dorsal midline.** Time-  
1056 lapse sequence of dorsal closure in two *M. abdita* embryos injected with the  
1057 fluorescent label FM 4-64. Top: serosa rupture and retraction in lateral view. Rupture  
1058 initiates at a ventral-posterior location and spreads anteriorly along the ventral side of  
1059 the embryo. The ruptured serosa accumulates on the dorsal side, where epidermal  
1060 seaming occurs at the end of dorsal closure. Bottom: dorsal view of the initiation of  
1061 dorsal closure, marked by the fusion of the dorsal ridge and straightening of the  
1062 epidermal leading edge (see figure 1— supplement 3A). Epidermal flanks are brought  
1063 together to the dorsal midline where epidermal seaming occurs. In both embryos,  
1064 anterior is to the left.

1065

1066 **Video 2. The extraembryonic serosa of *Megaselia abdita* embryos internalizes**  
1067 **into the yolk prior to epidermal seaming.** Time-lapse sequence of a dorsal (top) and  
1068 orthogonal view (bottom) of an FM 4-64-labeled embryo. After serosa rupture and  
1069 accumulation at the dorsal opening, the extraembryonic tissue internalizes into the  
1070 yolk, as observed by an inward bending of the tissue and apicobasal cell elongation.  
1071 Upon internalization of the serosa, the epidermal flanks advance and fuse at the dorsal  
1072 midline. In the dorsal view, anterior is to the top. In the orthogonal view, dorsal is to  
1073 the top.

1074

1075 **Video 3. Knock-down of *Mab\_bsk* by RNAi does not prevent serosa rupture and**  
1076 **retraction despite preventing epidermal flanks from closing in *Megaselia abdita***  
1077 **embryos.** Bright-field time-lapse sequence of serosa retraction in a *M. abdita* embryo  
1078 injected with *Mab\_bsk* dsRNA at early stages of development. Knock-down of  
1079 *Mab\_bsk* does not impair serosa rupture and retraction despite preventing embryos  
1080 from closing the dorsal hole. Embryo in lateral view. Anterior is to the left, dorsal to  
1081 the top.

1082

1083 **Video 4. Injection of the Rho kinase inhibitor Y-27632 prevents dorsal closure**  
1084 **and slows down serosa retraction in *Megaselia abdita*.** Time-lapse sequence of  
1085 dorsal closure in a FM 4-64 labeled *M. abdita* embryo injected with the Rho kinase  
1086 (ROCK) inhibitor Y-27632, which downregulates actomyosin-based contractility.  
1087 Note the slow rupture and retraction of the serosa, and the failure of the epidermal  
1088 flanks to advance and close. Embryo in side view where anterior is to the left, dorsal  
1089 to the top. Note that the static stains observed are stains on the vitelline envelope  
1090 arising from embryo treatment prior to imaging.

1091

1092 **Video 5. Injection of the Rho kinase inhibitor Y-27632 prevents internalization**  
1093 **of the serosa in *Megaselia abdita* embryos.** Time-lapse sequence of a dorsal (top)  
1094 and orthogonal view (bottom) of serosa rupture in an FM 4-64 labeled *M. abdita*  
1095 embryo. Injection of the Rho kinase (ROCK) inhibitor Y-27632 (to downregulate  
1096 actomyosin-based contractility) prevents internalization of the serosa. The inward  
1097 bending and apicobasal cell elongation of the extraembryonic tissue into the yolk is

1098 not observed in orthogonal view. In the dorsal view, anterior is to the top. In the  
1099 orthogonal view, dorsal is to the top. Note that the static stains observed are stains on  
1100 the vitelline envelope arising from embryo treatment prior to imaging.

1101

1102 **Video 6. Amniotic seaming followed by epidermal seaming during the late stage**  
1103 **of dorsal closure in *Megaselia abdita*.** Time-lapse sequence of the final stage of  
1104 dorsal closure in a *M. abdita* embryo fluorescently labeled with FM 4-64. The amnion  
1105 flanks are brought together and seamed at the dorsal midline upon serosa ingression.  
1106 This process is followed by seaming of the epidermal flanks at the dorsal midline.  
1107 Both seaming processes initiate at the posterior end of the embryo. Embryo in dorsal  
1108 view. Anterior is to the left. Note that the static stains observed are stains on the  
1109 vitelline envelope arising from embryo treatment prior to imaging.

1110

1111 **Video 7. The initial stages of serosa internalization in colcemid-injected embryos**  
1112 **of *Megaselia abdita* occur as in wild-type embryos.** Time-lapse sequence in  
1113 orthogonal view of dorsal closure during serosa internalization in FM 4-64-labeled  
1114 *M. abdita* embryos. The inward bending of the extraembryonic tissue and apicobasal  
1115 cell elongation into the yolk is observed in wild-type control (top) and colcemid-  
1116 injected embryos (bottom). Injection of colcemid induces microtubule polymerization  
1117 and impairs the late stages of dorsal closure (see video 8). Dorsal is to the top.

1118

1119 **Video 8. Colcemid injection prevents dorsal closure in *Megaselia abdita*.** Time-  
1120 lapse sequence of impaired dorsal closure in an FM 4-64-labeled *M. abdita* embryo  
1121 after injection of colcemid to induce microtubule depolymerization. The initial stages  
1122 of dorsal closure (straightening of the epidermal leading edge and serosa rupture and  
1123 retraction) are not affected. The process of dorsal closure is aborted during the late  
1124 stages (amniotic seaming and epidermal seaming). Embryo in dorsal view. Anterior is  
1125 to the left.

1126

1127 **Video 9. Colcemid injection impairs amniotic flank seaming during dorsal closure**  
1128 **in *Megaselia abdita*.** Time-lapse sequence in lateral view of the latest stages of dorsal  
1129 closure in FM 4-64-labeled *M. abdita* embryos. Amnion cell elongation can be  
1130 observed in a wild-type embryo (top) resulting in the seaming of the amniotic flanks  
1131 followed by seaming of the epidermal flanks. In colcemid-injected embryos (bottom),  
1132 amnion cells initially elongate but fail to maintain elongation and retract from the  
1133 amniotic merging at the dorsal midline. Note that the static stains observed are stains  
1134 on the vitelline envelope arising from embryo treatment prior to imaging.

1135

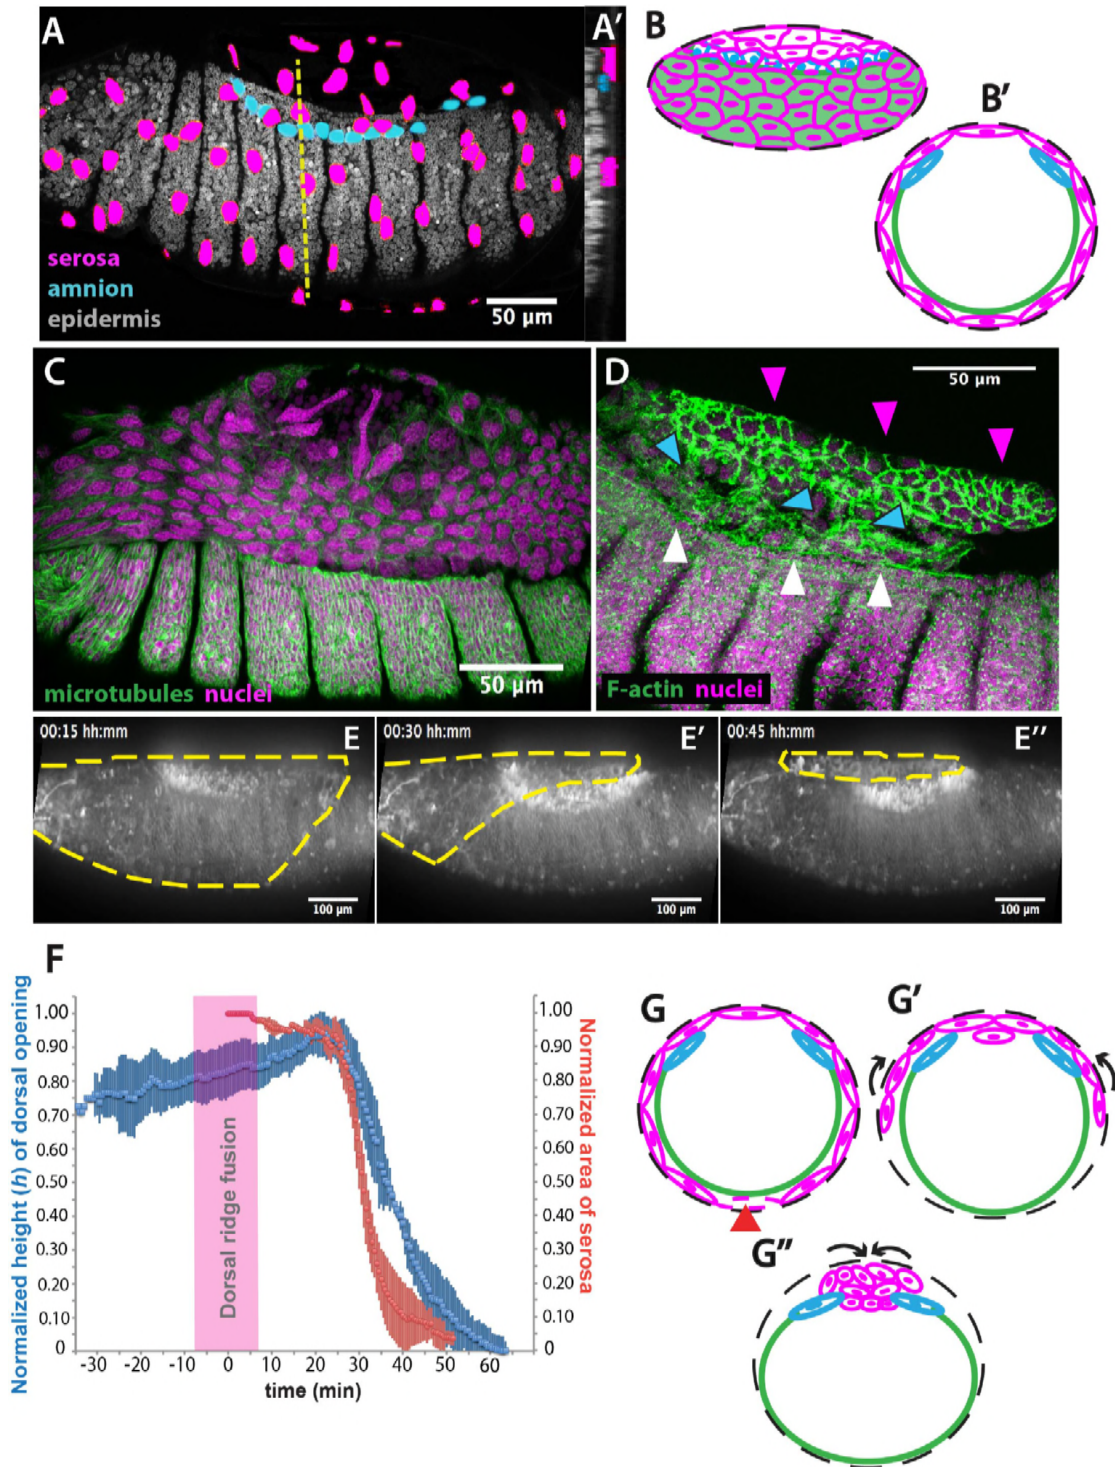

Figure 1.

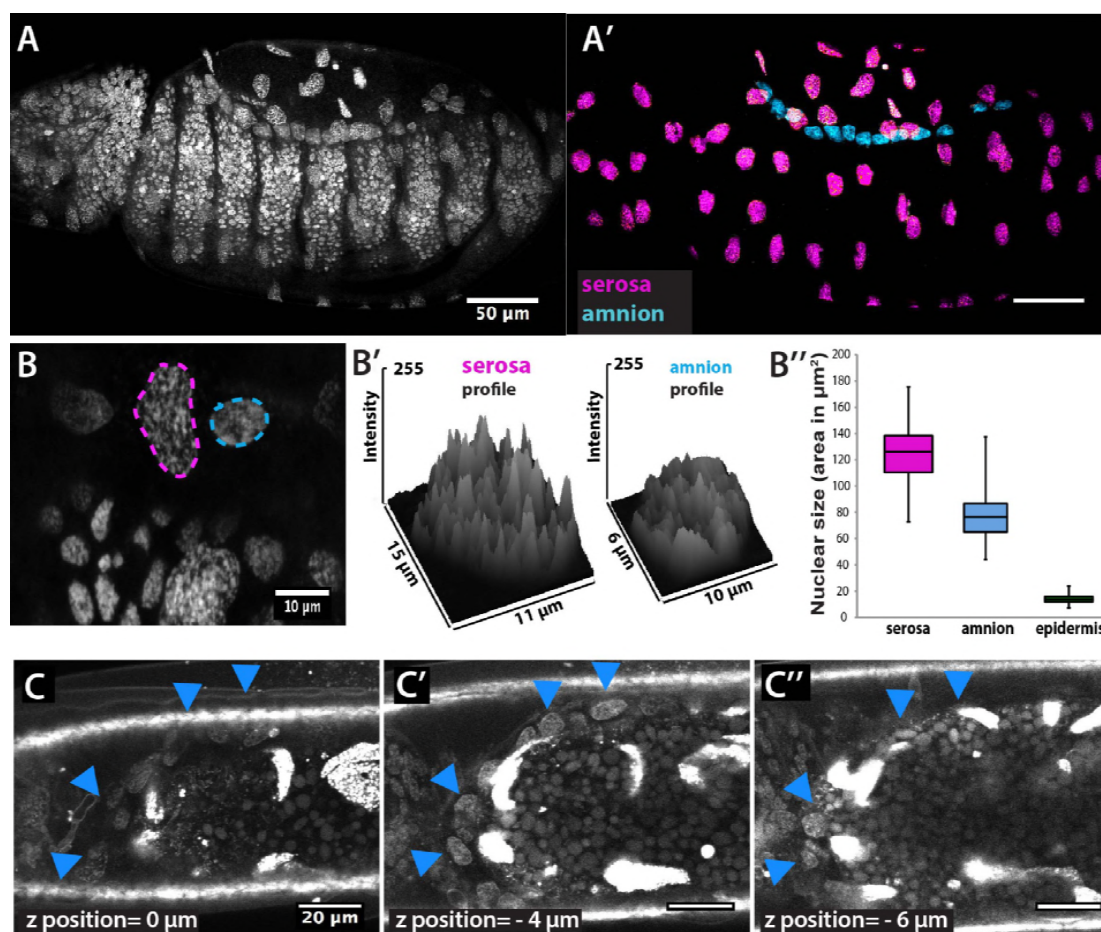

Figure 1— supplement 1.

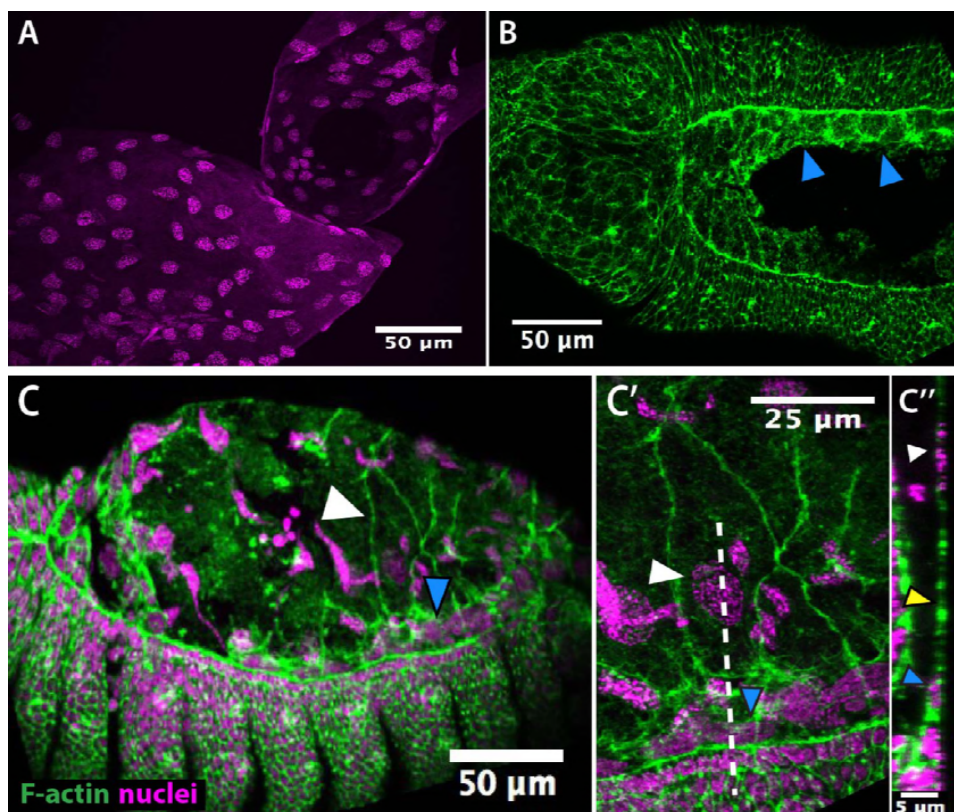

Figure 1— supplement 2.

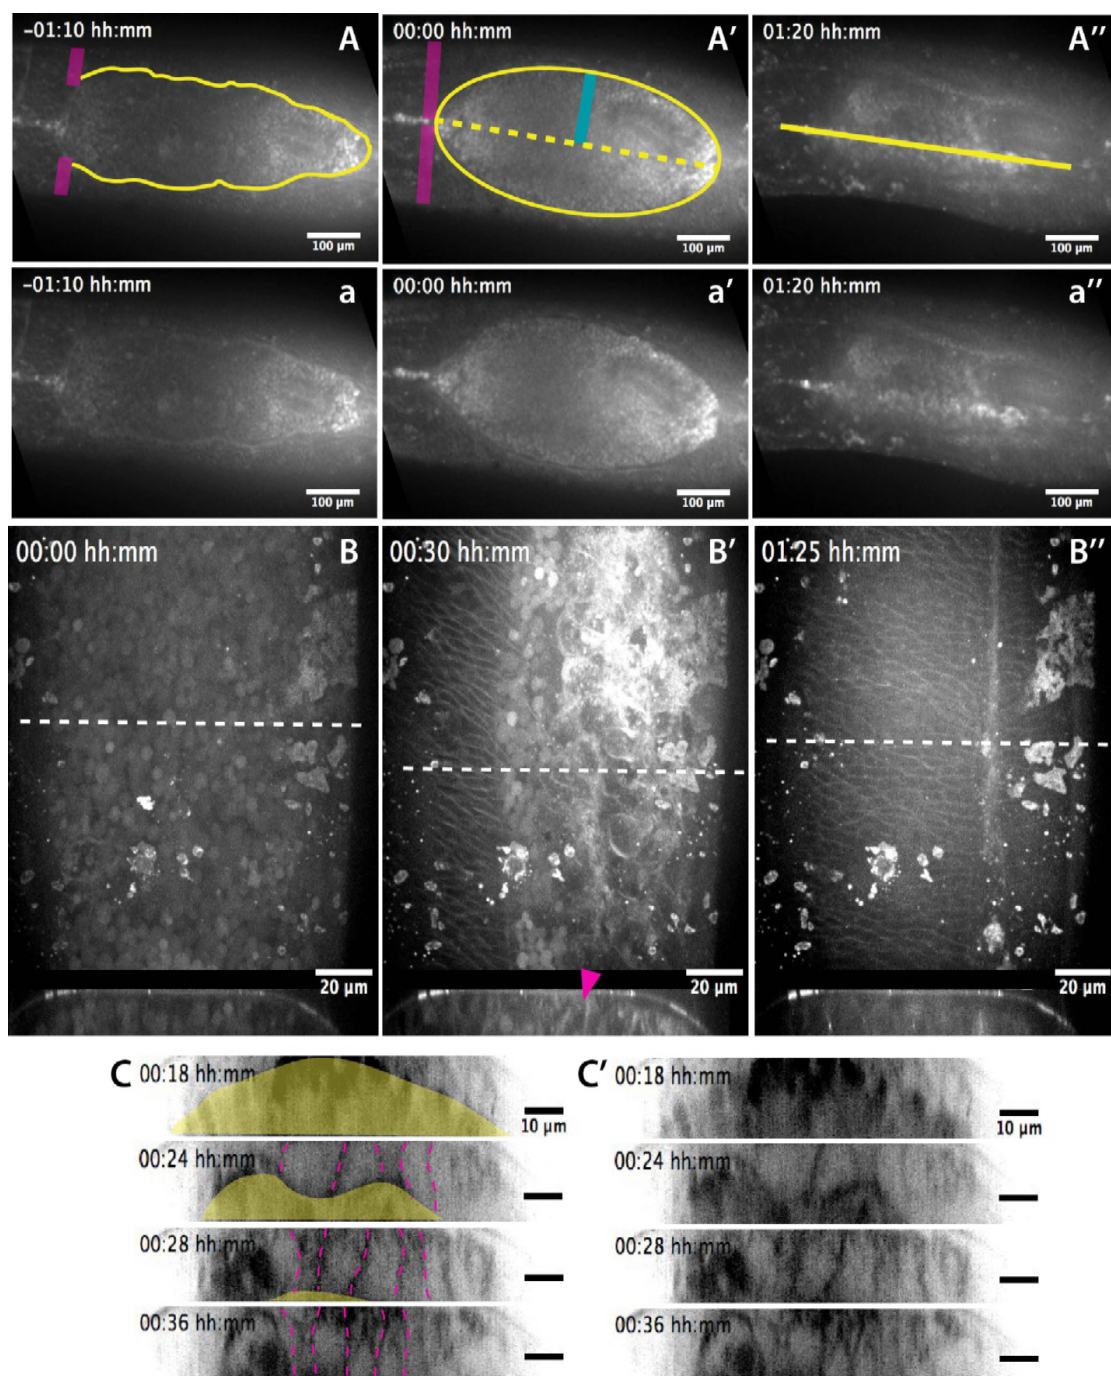

Figure 1— supplement 3.

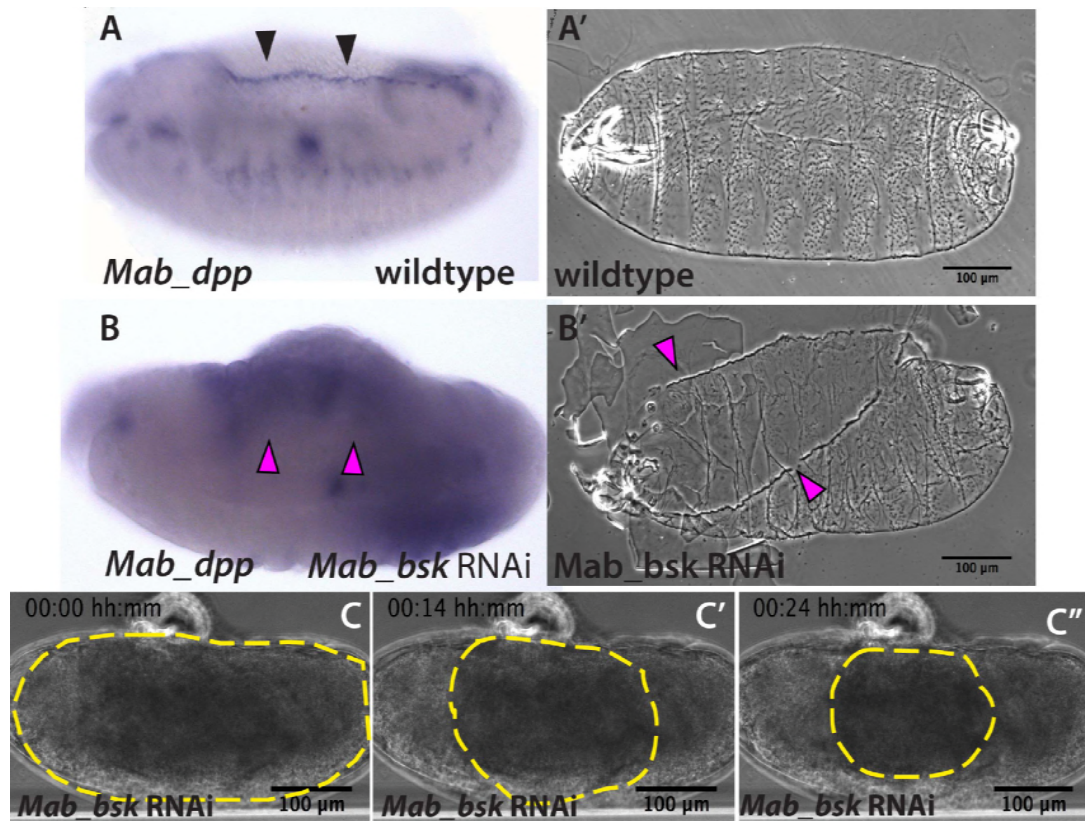

Figure 2.

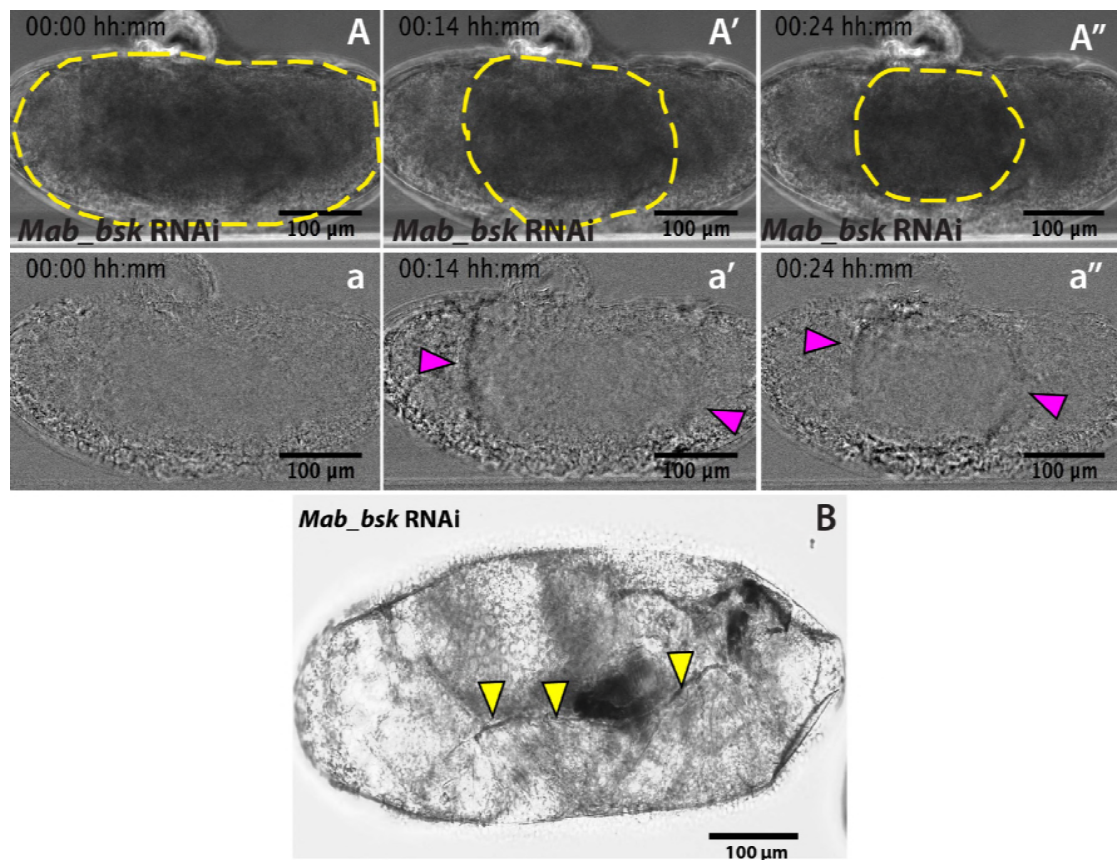

Figure 2— supplement 1.



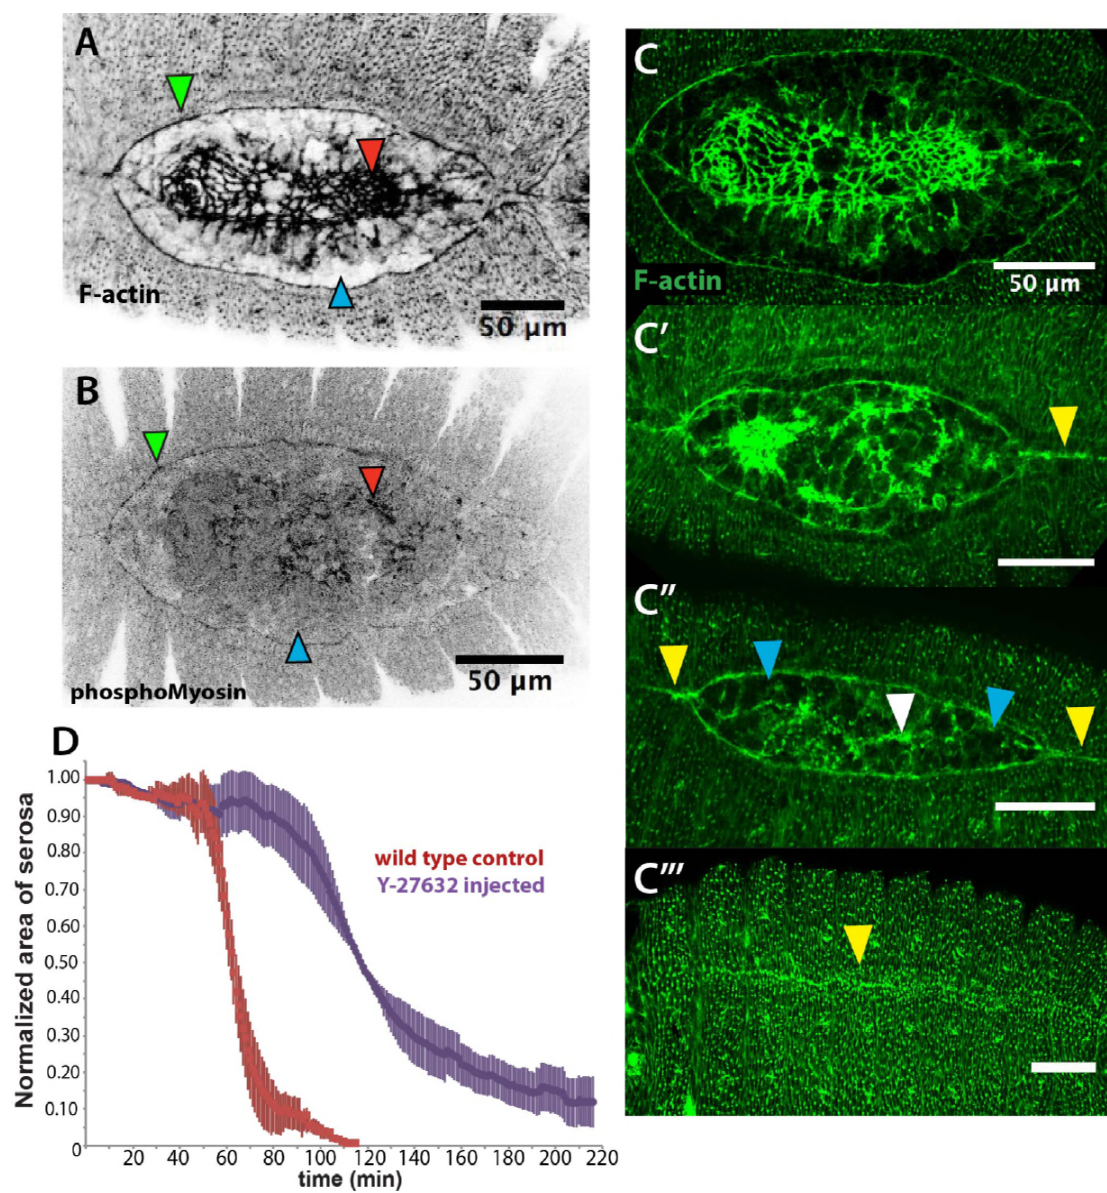

**Figure 3.**

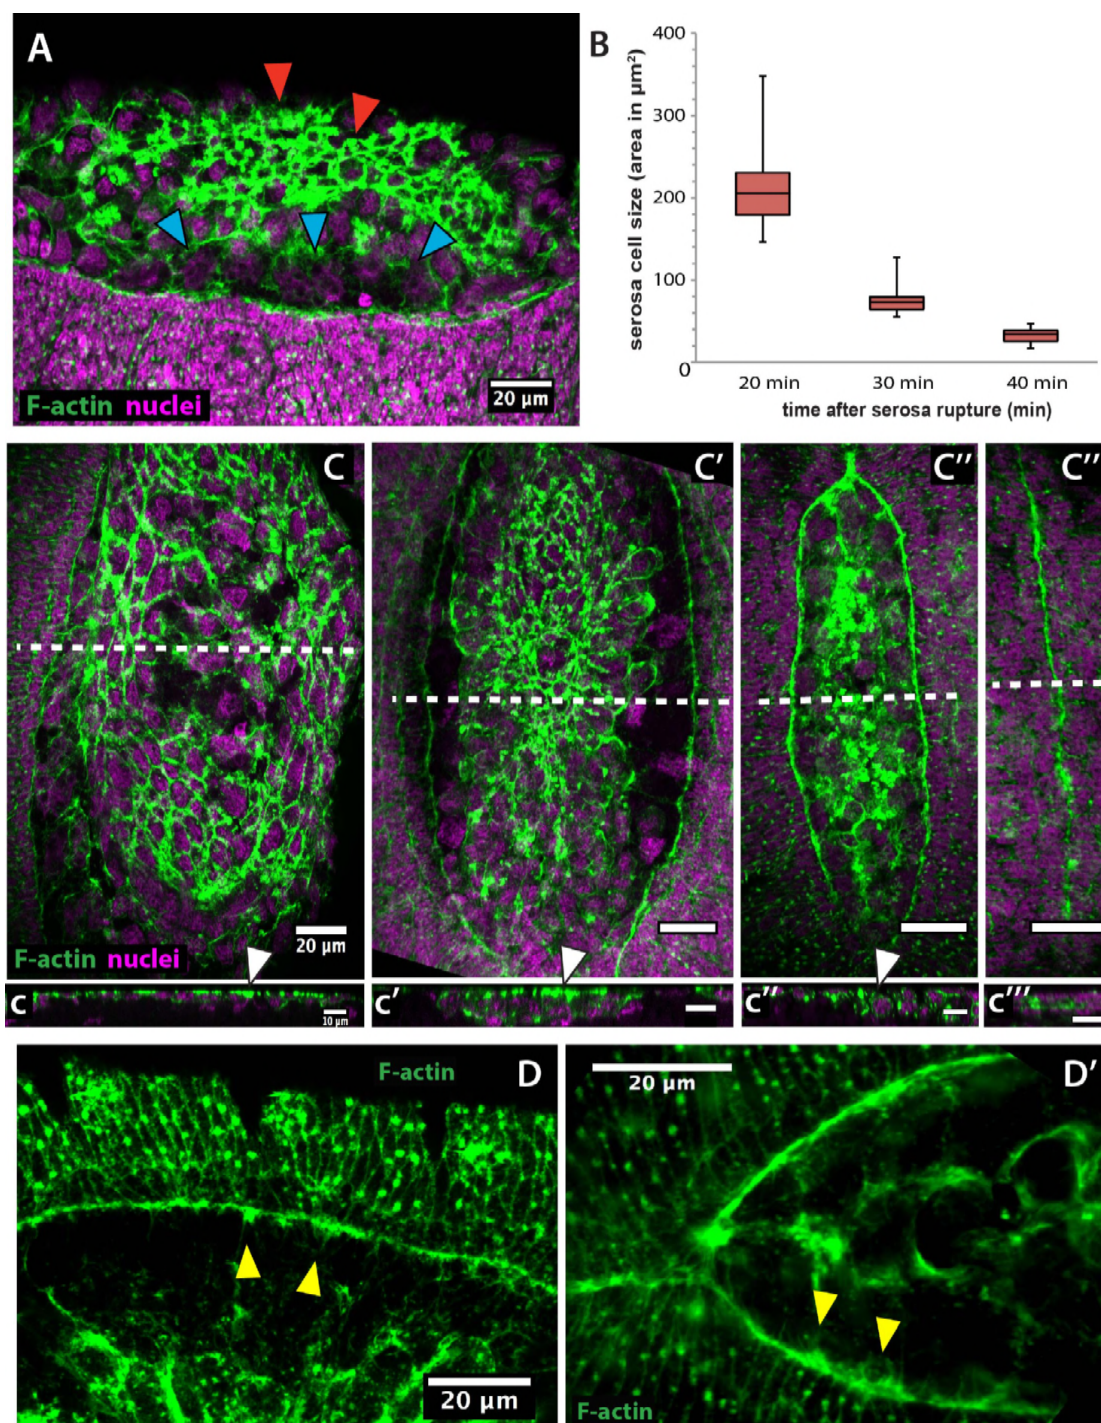

Figure 3— supplement 1.

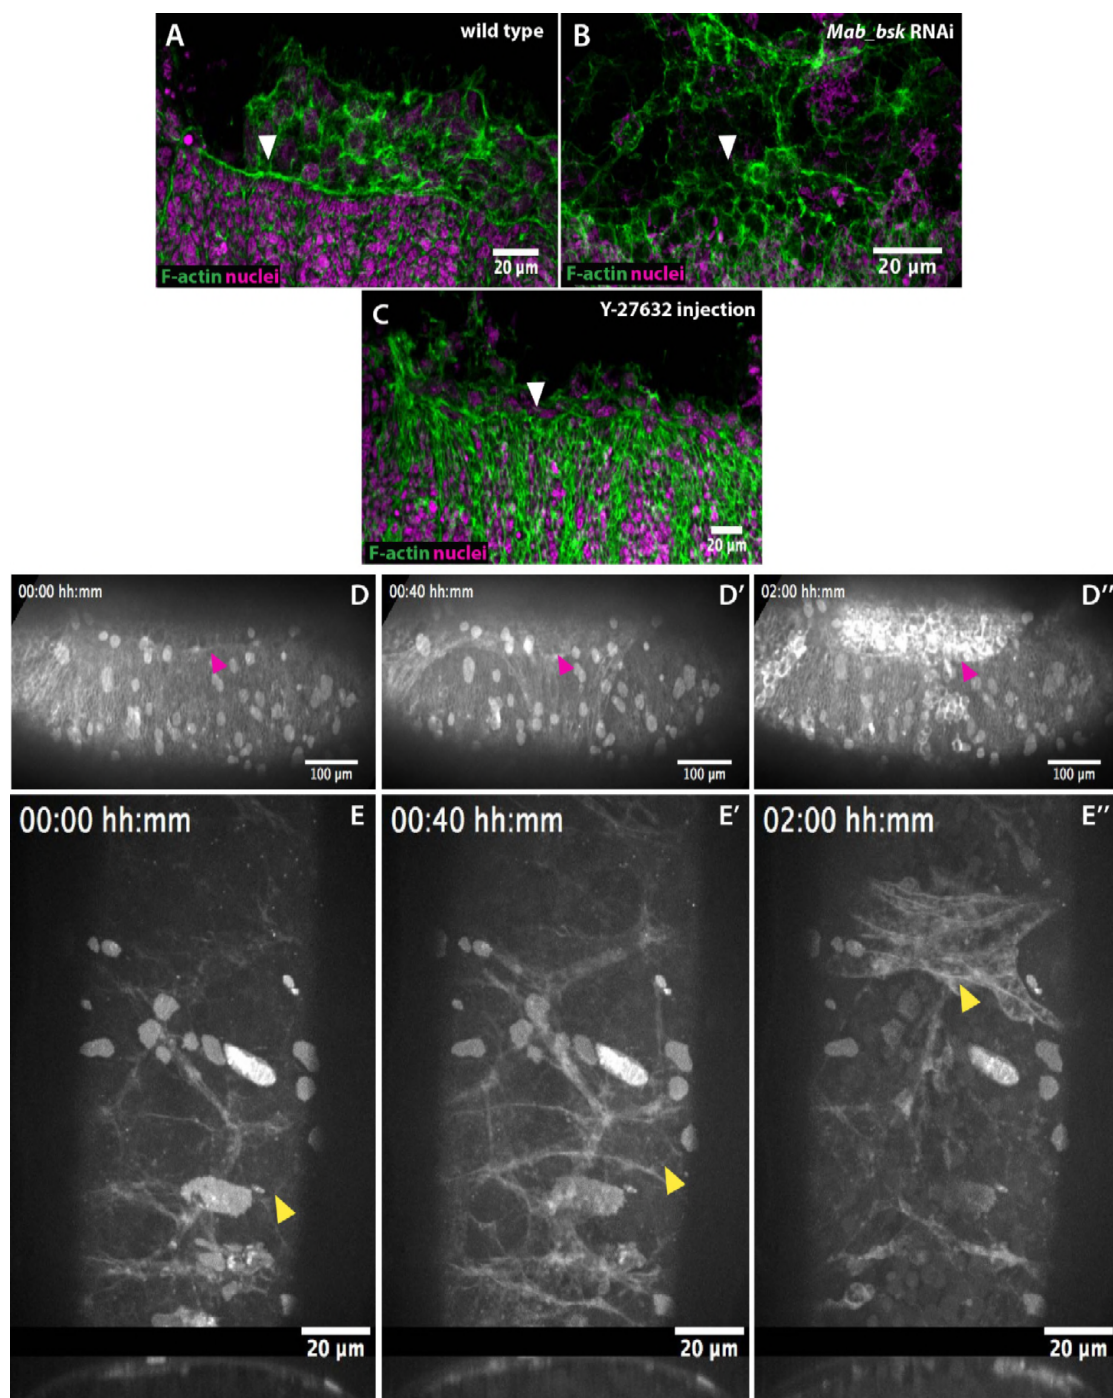

Figure 3— supplement 2.

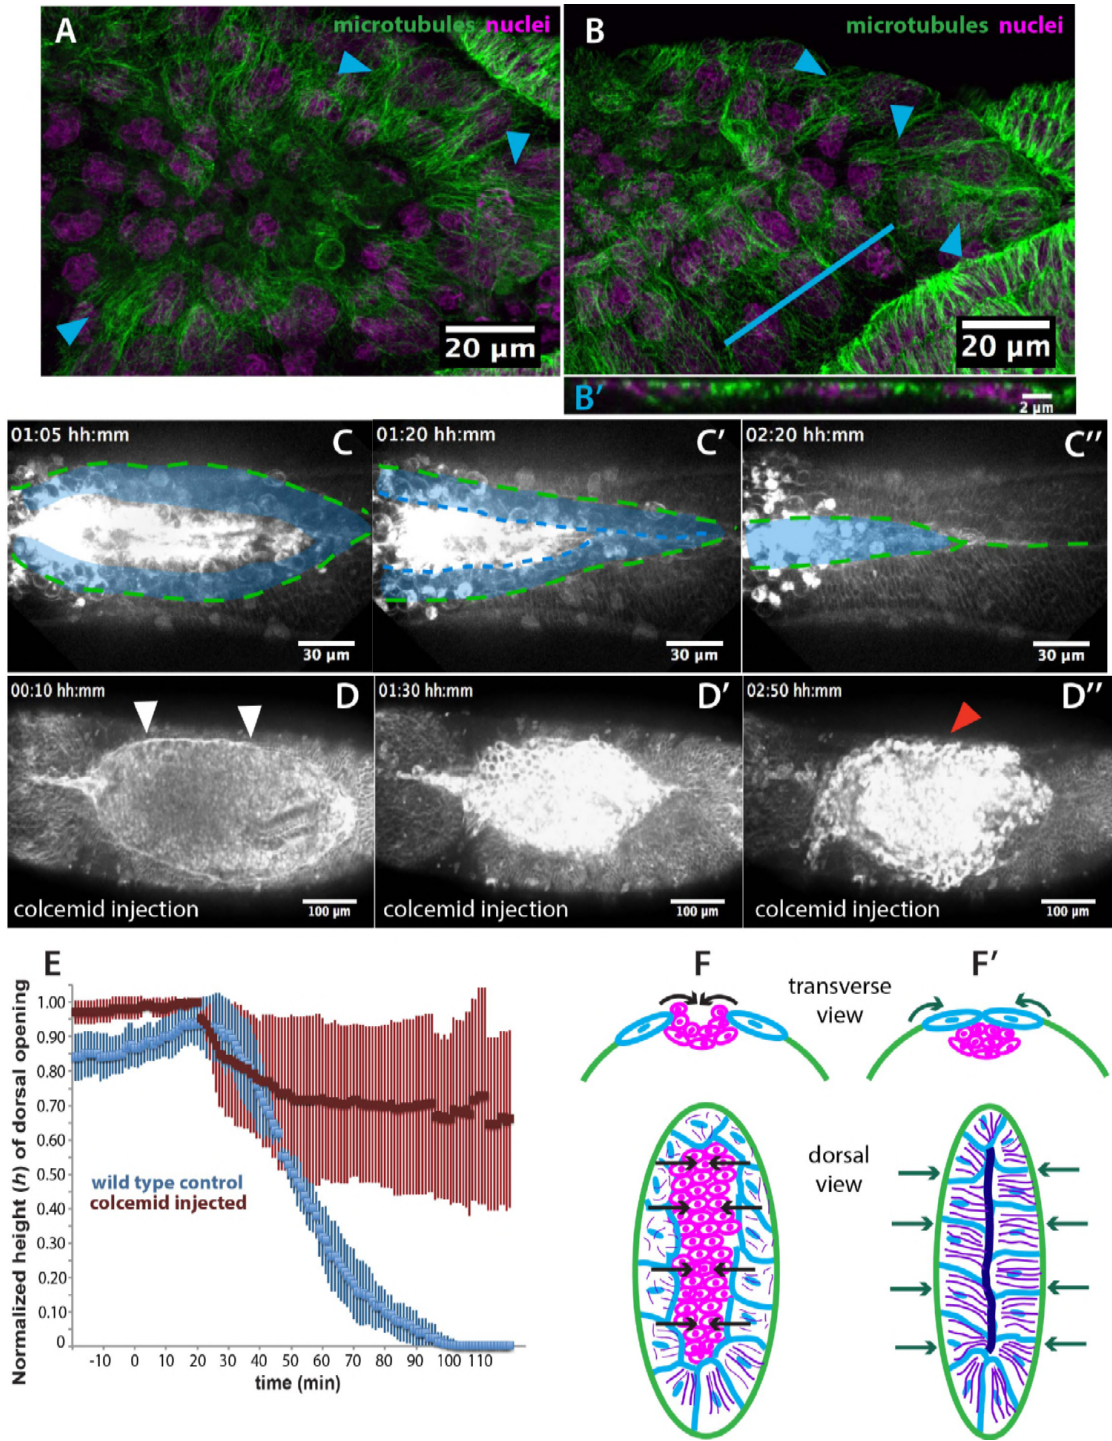

**Figure 4.**

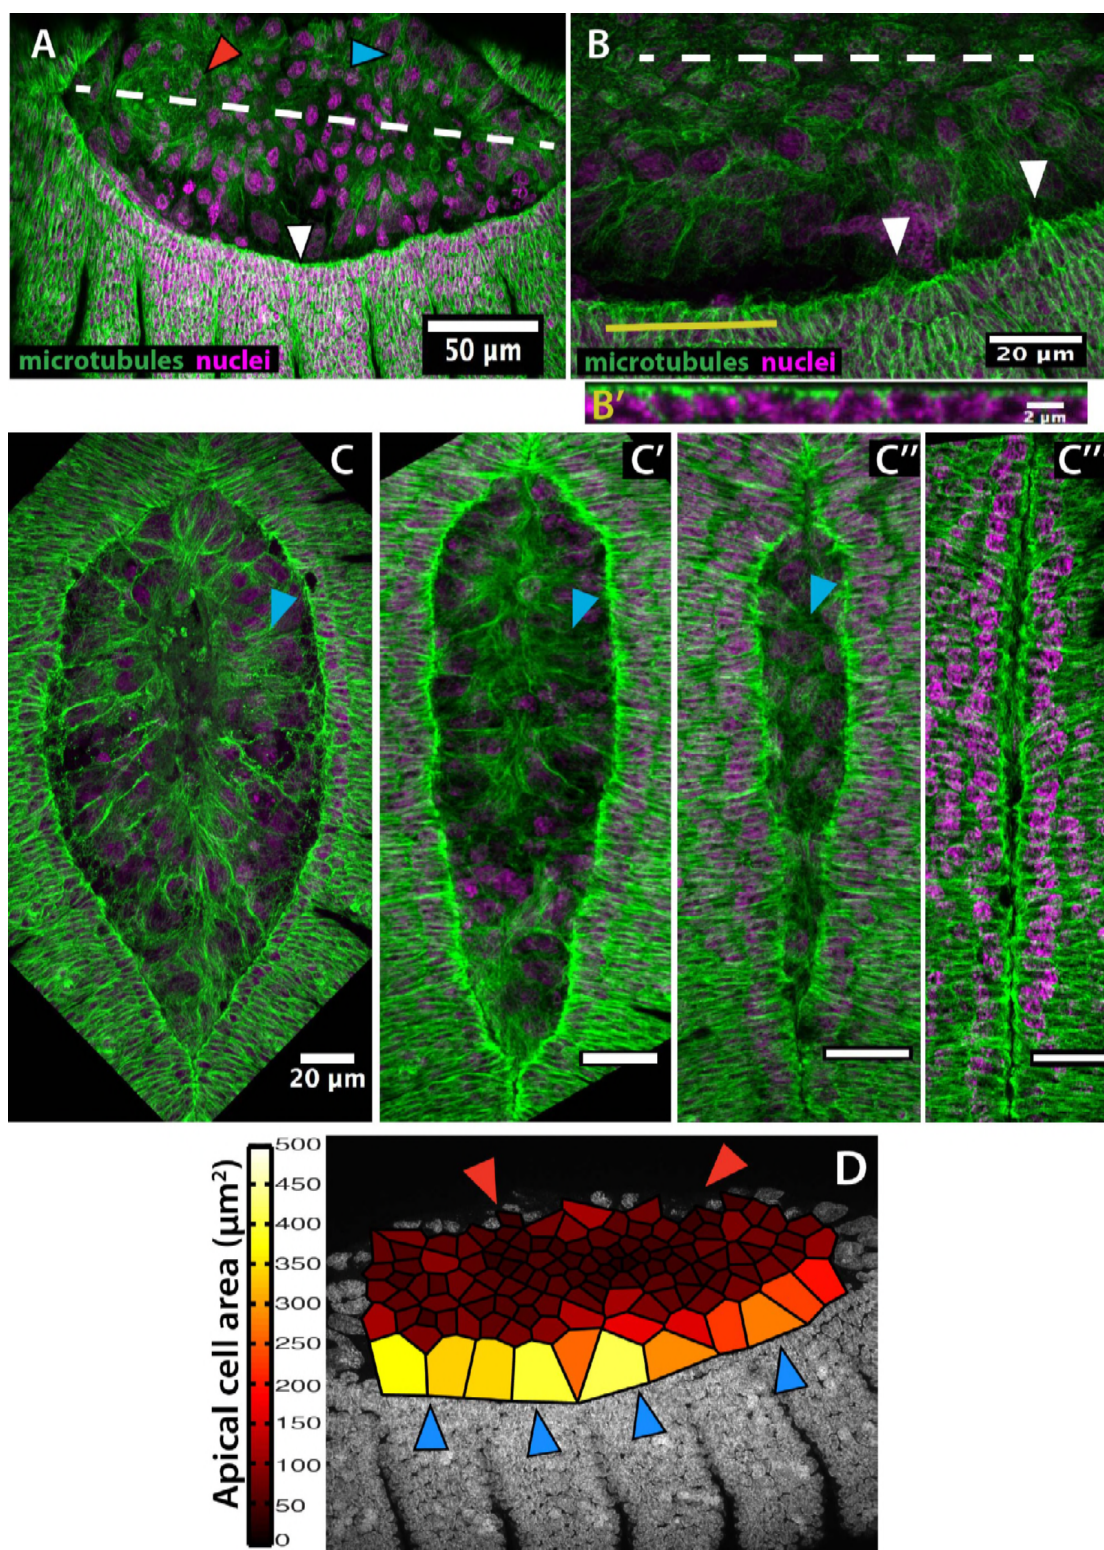

Figure 4— supplement 1.

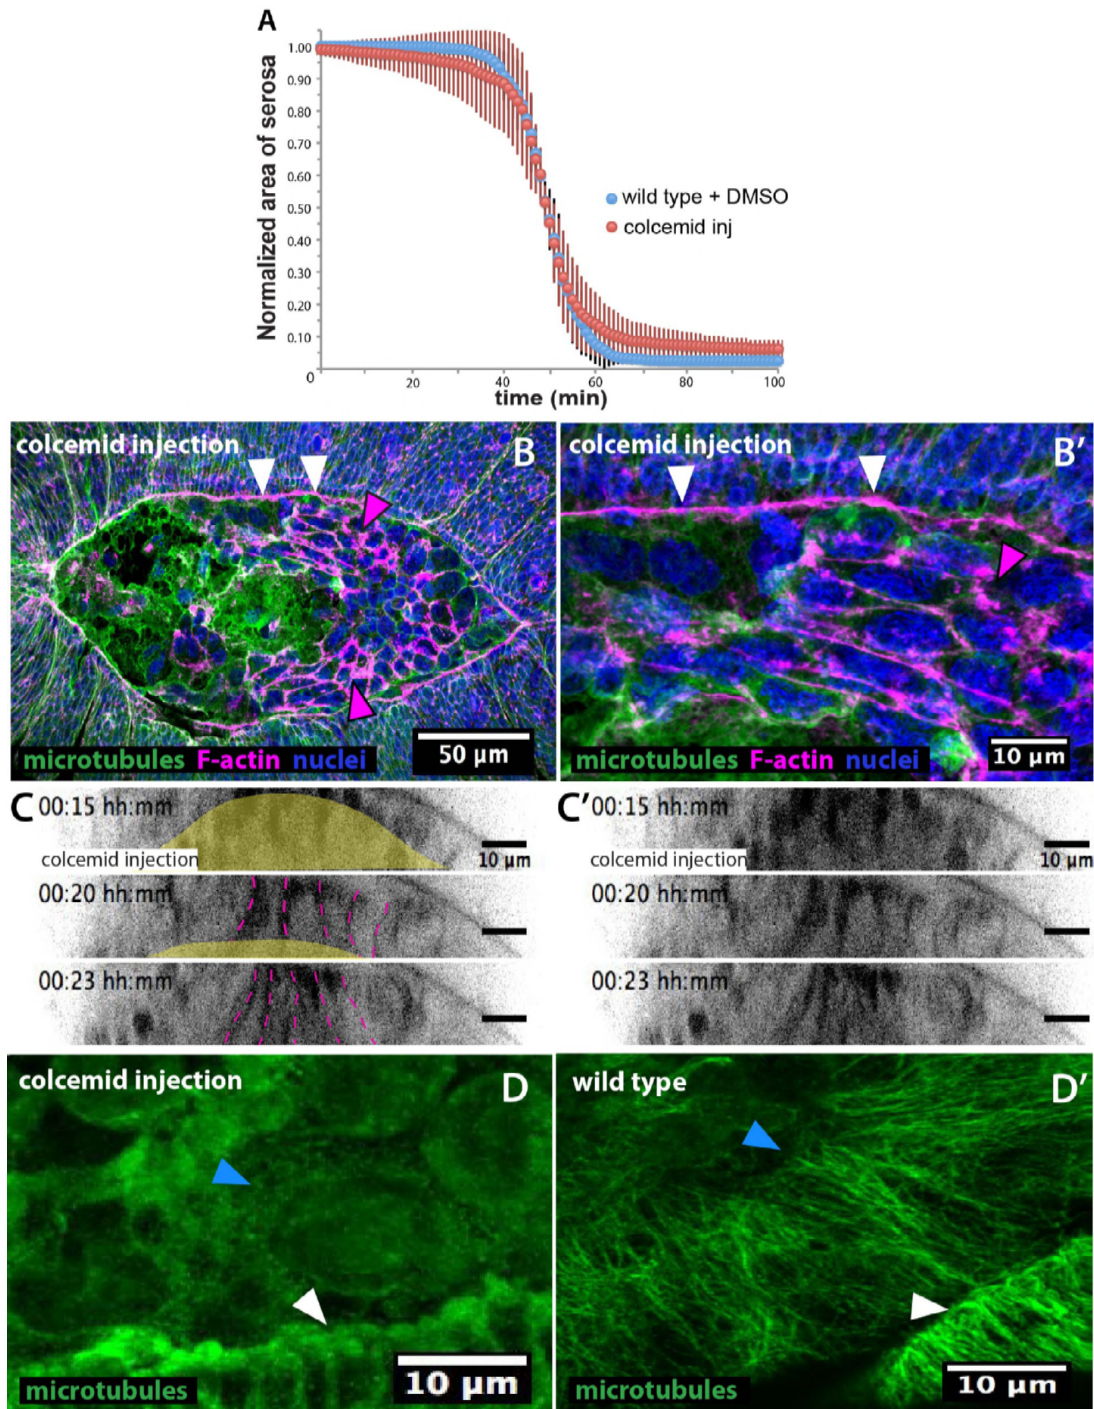

Figure 4— supplement 2.

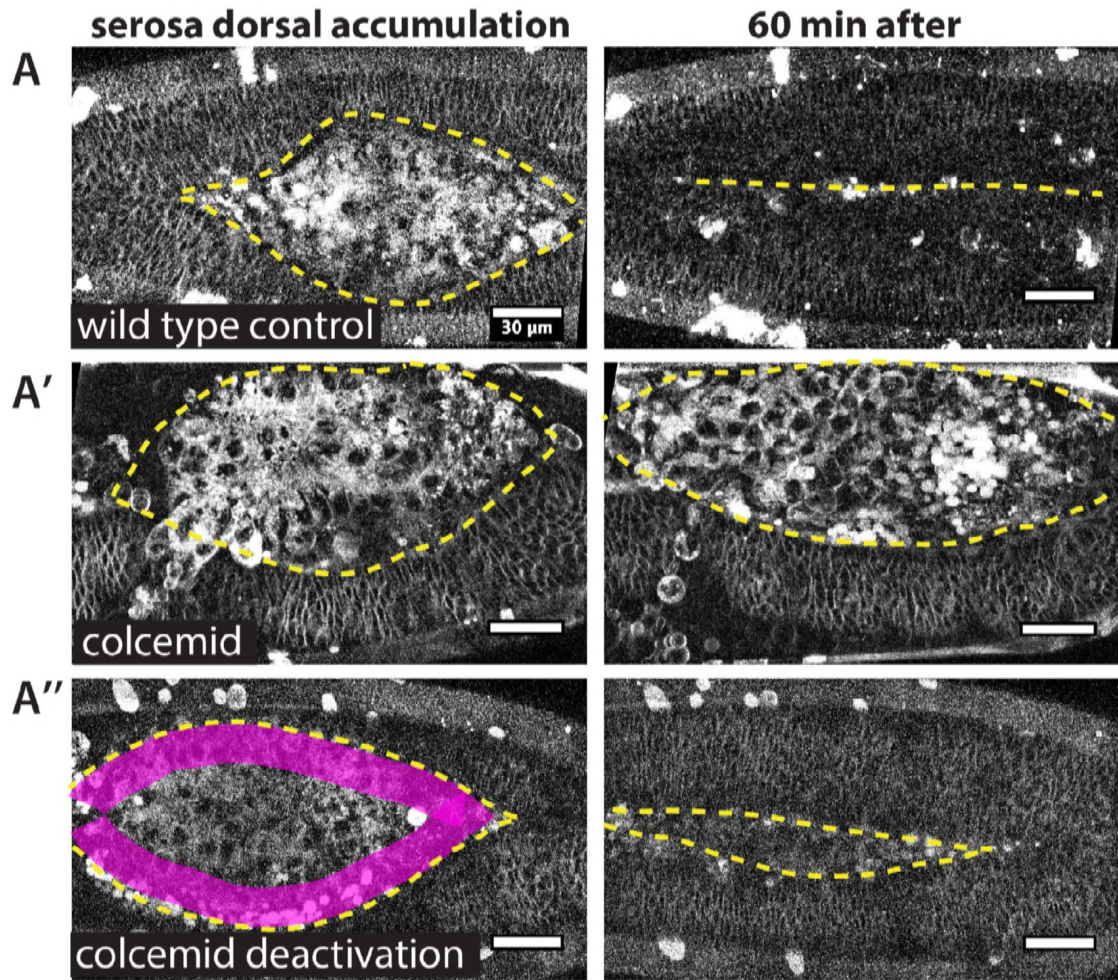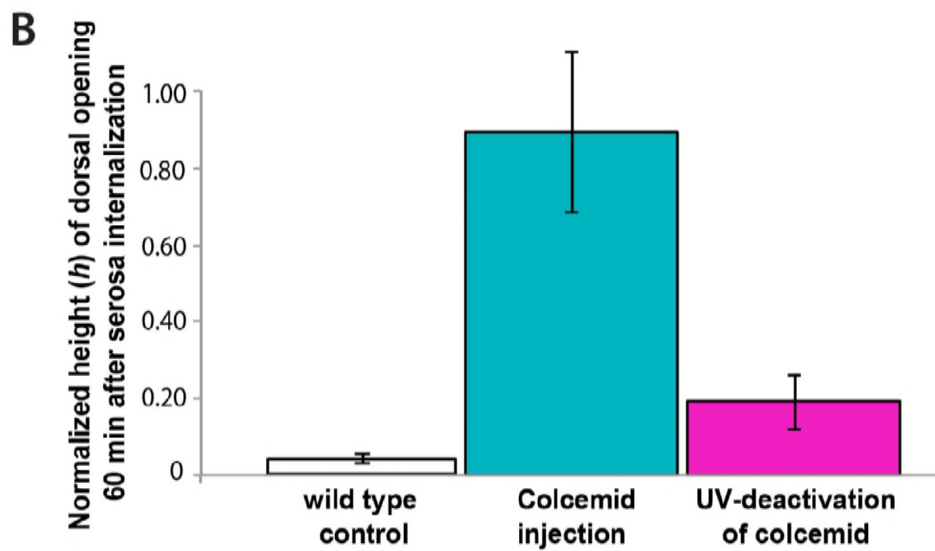

Figure 4— supplement 3.

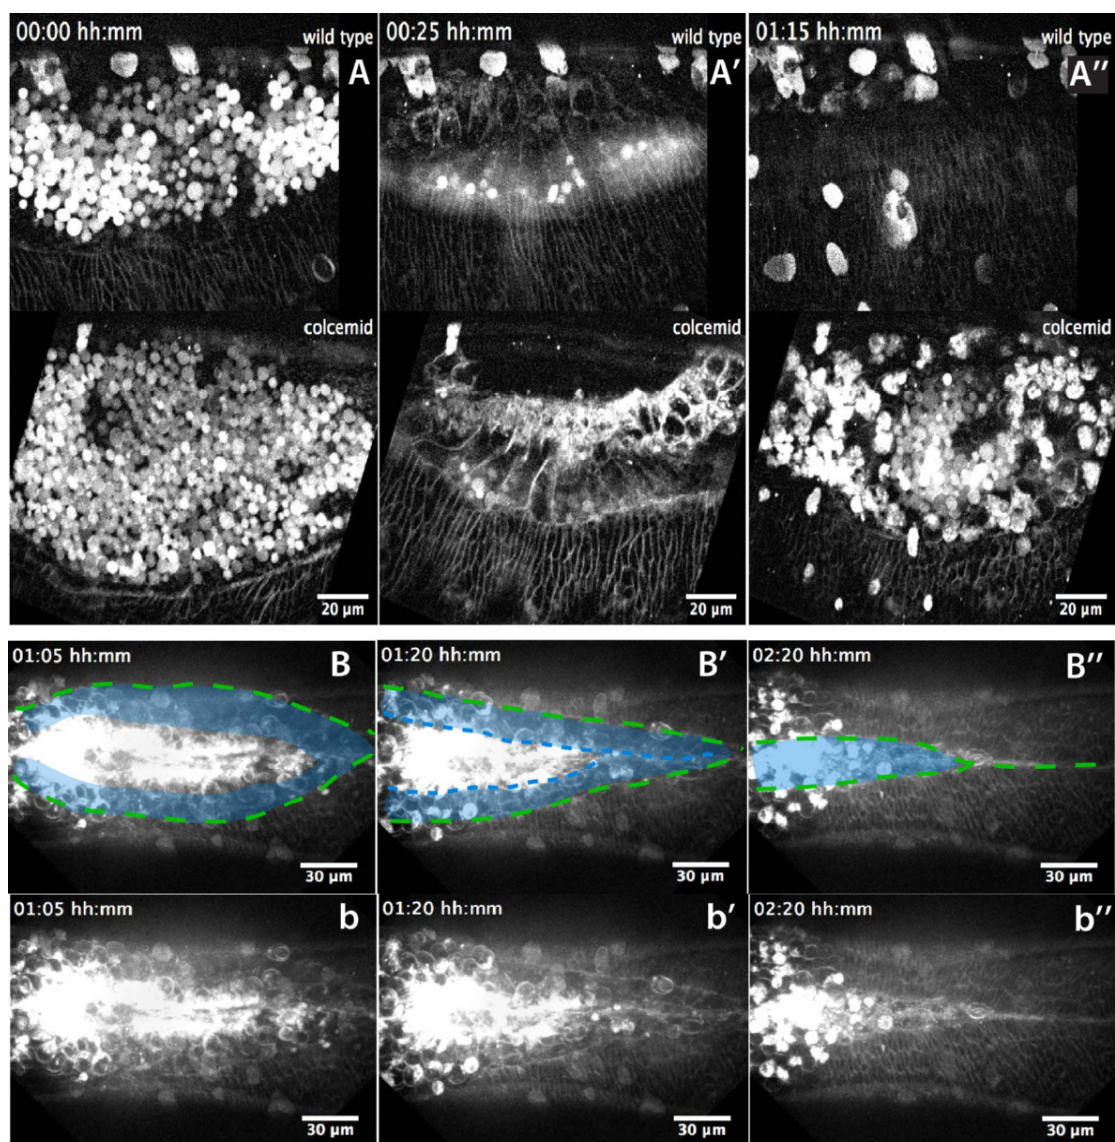

Figure 4— supplement 4.
